# Supplementary material for: Association of Dietary Patterns with MRI Markers of Hepatic Inflammation and Fibrosis in the MAST4HEALTH Study
Source: MDPI journal article supplement (doi:10.3390/ijerph19020971), 2022-01-16
Supplement: s1 [file s1]

## Supplementary Material

**Table S1.** 66 food items were categorized into 25 food groups.

| <b>Food Groups</b>                     | <b>Food Items (66)</b>                                                                                                                                                                                   |
|----------------------------------------|----------------------------------------------------------------------------------------------------------------------------------------------------------------------------------------------------------|
| 1 Vegetables   cooked mixed vegetables | Tomato/cucumber/carrot/pepper   Broccoli/cauliflower/courgetti   Lettuce/cabbage/spinach/rocket   Greens/celery/spinach   Spinach-rice/ cabbage-rice   Petit pois (peas) / green beans / okra /artichoke |
| 2 Fruits                               | Orange   Apple/pear   Other winter-fruits   banana   Other summer – fruits                                                                                                                               |
| 3 Fruit juice                          |                                                                                                                                                                                                          |
| 4 Dried fruits                         |                                                                                                                                                                                                          |
| 5 Eggs                                 |                                                                                                                                                                                                          |
| 6 Fish                                 | small fish   large fish                                                                                                                                                                                  |
| 7 Sea-food                             | Sea-food (octopus, sleeve-fish, prawns)                                                                                                                                                                  |
| 8 Pulses                               | Pulses (lentils, beans, chickpeas)                                                                                                                                                                       |
| 9 Nuts                                 |                                                                                                                                                                                                          |
| 10 Pies                                | Home made pies (e.g. Cheese-pie, spinach-pie)   Pies                                                                                                                                                     |
| 11 Fast Food                           | Toasted sandwich/sandwich   burger-bread   French fried potatoes                                                                                                                                         |
| 12 Salty Snacks                        | Chips/pop-corn   crisp bread                                                                                                                                                                             |
| 13 Sweets                              | Sweets made in tray   Sweet preserves/stewed fruit/fruit – jelly   Gateau/tart   Croissant/gofer/cake/biscuits   chocolate   Honey/marmalade/sugar   Cereal/cereal bars                                  |
| 14 Sauces                              | Mayonnaise/sauce   Light mayonnaise/light sauce                                                                                                                                                          |
| 15 Vegetable Fat                       | seed oil, olive oil   olives                                                                                                                                                                             |
| 16 Animal & Hydrogenated Fats          | Butter   margarine                                                                                                                                                                                       |
| 17 Poultry                             | Chicken/turkey (all kind)                                                                                                                                                                                |
| 18 Red Meat                            | Veal (steak, filet)   Burger/ meat balls/ minced-meat   Pork (steak, filet)   Lamb/goat/game/ lamb-chops   Pastitsio/moysakas/papoytsakia                                                                |
| 19 Processed Meat                      | Sausage / bacon   Light/no fat cold sliced meats   Cold sliced meats                                                                                                                                     |

|    |                  |                                                                                                                               |
|----|------------------|-------------------------------------------------------------------------------------------------------------------------------|
| 20 | Dairy (Low-fat)  | Low fat milk/yogurt   Low fat cheese (light/ cottage)                                                                         |
| 21 | Dairy (High-fat) | High fat milk/yogurt   Yellow cheese/cream cheese   White cheese (e.g. feta cheese)   Ice-cream/milk-shake/cream/rice pudding |
| 22 | Refined grains   | White bread/toast   white rice   Pasta/ pearl barley   Potatoes boiled/baked/mashed                                           |
| 23 | Whole grains     | Whole meal bread/rusk   brown rice   Whole meal pasta                                                                         |
| 24 | Soft drinks      | Soft drinks   Light soft drinks                                                                                               |
| 25 | Coffee and Tea   | Coffee, Tea/other teas                                                                                                        |

**Table S2.** The comparison of demographic, anthropometric, lifestyle, MRI and biochemical parameters in different levels of the dietary patterns.

| Variables                      | High-Sugar pattern |                   |                |         | Prudent pattern |                   |                  |                |
|--------------------------------|--------------------|-------------------|----------------|---------|-----------------|-------------------|------------------|----------------|
|                                | Low                | Medium            | High           | P-value | Low             | Medium            | High             | p-value        |
| age ***                        | 49 (14)            | 51 (18)           | 48 (13)        | 0.9767  | 46.5 (15.25)    | 49 (17.5)         | 49 (10)          | 0.3838         |
| sex (F M)                      | 10 22              | 10 22             | 9 24           | 0.9211  | 8 24            | 12 20             | 9 24             | 0.5073         |
| center of the study (GR IT SR) | 13 12 7            | 13 12 7           | 12 6 15        | 0.1481  | 13 5 14         | 14 9 9            | 11 16 6          | <b>0.04265</b> |
| smoking (Yes No)               | 4 27               | 8 24              | 9 24           | 0.3319  | 9 23            | 6 26              | 6 26             | 0.5778         |
| BMI ***                        | 32.3 (4.49)        | 34.01 (3.61)      | 34.43 (7.83)   | 0.3385  | 32.03 (4.06)    | 33.56 (7.02)      | 34.72 (6.72)     | 0.1941         |
| PAL (total) ***                | 1406.25 (1419)     | 1775.75 (3716.25) | 1748 (3527.5)  | 0.419   | 1694.5 (6962)   | 1658.25 (2032.75) | 1552.5 (1742.62) | 0.459          |
| FindRisk Score ***             | 13 (4)             | 14 (4.5)          | 13 (4)         | 0.9642  | 13 (4)          | 12 (4)            | 14 (5)           | 0.3456         |
| cT1 (ms) ***                   | 882.23 (88.8)      | 862.64 (68.07)    | 868.6 (107.06) | 0.7391  | 864.62 (93.81)  | 874.71 (93.61)    | 877.42 (68.74)   | 0.8671         |
| PDFF (%) ***                   | 12.4 (13.82)       | 14.05 (14.88)     | 16.27 (15.14)  | 0.5405  | 15.18 (16.33)   | 11.14 (10.67)     | 15.68 (15.79)    | 0.3428         |
| LIF *                          | 2.26 (±0.7)        | 2.2 (±0.6)        | 2.32 (±0.59)   | 0.741   | 2.32 (±0.6)     | 2.19 (±0.62)      | 2.27 (±0.67)     | 0.701          |
| AST (IU/L)***                  | 23 (7.25)          | 24.5 (11)         | 22 (11)        | 0.7911  | 22.5 (9.75)     | 22 (10.75)        | 23.5 (11.25)     | 0.4678         |

|                                         |             |               |              |        |              |               |               |        |
|-----------------------------------------|-------------|---------------|--------------|--------|--------------|---------------|---------------|--------|
| <b>ALT (IU/L)***</b>                    | 28.5 (28)   | 36 (22.25)    | 33.5 (19.5)  | 0.8233 | 28.5 (20.5)  | 28 (26.25)    | 37 (20.75)    | 0.1741 |
| <b>AST/ALT ratio ***</b>                | 0.7 (0.24)  | 0.68 (0.33)   | 0.66 (0.18)  | 0.7347 | 0.73 (0.22)  | 0.68 (0.34)   | 0.66 (0.24)   | 0.1738 |
| <b>γ-gt (U/L) ***</b>                   | 33 (34.5)   | 39.5 (43)     | 30 (13)      | 0.1291 | 33.5 (32.25) | 31 (16.5)     | 33 (37)       | 0.4347 |
| <b>Total cholesterol (mg/dL)***</b>     | 196.1 (45)  | 200.5 (44.75) | 194 (48.4)   | 0.4455 | 196 (48.7)   | 196.1 (37.62) | 194 (47)      | 0.8564 |
| <b>HDL (mg/dL)***</b>                   | 46 (13.85)  | 42.45 (12.47) | 41 (12.7)    | 0.3645 | 42 (10.77)   | 45.5 (13.85)  | 44 (16)       | 0.2515 |
| <b>LDL (mg/dL)***</b>                   | 121 (32.5)  | 125.5 (43.3)  | 114 (42.8)   | 0.2581 | 125 (46.05)  | 120 (24)      | 113.3 (33)    | 0.5244 |
| <b>triglycerides (mg/dl)***</b>         | 130 (87.67) | 137.5 (119.9) | 132 (72.9)   | 0.7201 | 143 (64.42)  | 131 (98.03)   | 130 (114)     | 0.5312 |
| <b>glucose (mg/dL) ***</b>              | 100 (12)    | 102.5 (13.8)  | 100.8 (17)   | 0.7956 | 97.2 (13.4)  | 104.4 (11.4)  | 100.9 (12.25) | 0.1628 |
| <b>120 min-OGTT glucose (mg/dL) ***</b> | 129 (47.9)  | 108 (44.2)    | 128.7 (72.2) | 0.2391 | 125.1 (65.7) | 111 (40.05)   | 128.5 (62.2)  | 0.6484 |
| <b>HOMA-IR***</b>                       | 4.45 (2.87) | 4.27 (3.14)   | 4.86 (3.23)  | 0.7515 | 4.2 (2.57)   | 4.58 (2.94)   | 4.53 (4.71)   | 0.8925 |
| <b>Insulin (μU/mL)***</b>               | 15.8 (9.65) | 17 (8.25)     | 18.2 (11.55) | 0.8129 | 16.2 (8.12)  | 17.7 (9.1)    | 16.45 (16.8)  | 0.9895 |

Note: The normality assumption was checked using the Shapiro-Wilk test.; \* parametric variable, \*\*\* non parametric variable.; Parametric quantitative variables are expressed as mean (± standard deviation (SD)), non-parametric quantitative variables as median (interquartile range (IQR)) and categorical variables as numbers.; P value was obtained using Kruskal-Wallis with Dunn's post-hoc test or ANOVA with Tukey's post-hoc test for continuous non parametric and parametric variables, respectively and chi-square test for categorical variables; †Differences between low and high tertile, ‡Differences between medium and high tertile, ˆ Differences between low and medium tertile; PAL: physical activity level; FindRisk Score: Finnish Diabetic Risk Score; cT1: included iron-corrected; proton density fat fraction (PDFF); Liver Inflammation Fibrosis score (LIF); AST: aspartate transaminase; ALT: alanine transaminase; AST/ALT ratio: AST to ALT ratio; γ-GT: γ-glutamyltransferase; HDL: High-density lipoprotein; LDL: Low-density lipoprotein; HOMA-IR: homeostatic model assessment of insulin resistance

**Table S2. Cont.**

| Variables        | Western pattern |         |           |         | High-Fat And Salt pattern |           |         |         |
|------------------|-----------------|---------|-----------|---------|---------------------------|-----------|---------|---------|
|                  | Low             | Medium  | High      | p-value | Low                       | Medium    | High    | p-value |
| <b>age ***</b>   | 51.5 (9.5)      | 48 (16) | 44.5 (14) | 0.1716  | 49 (13)                   | 53 (16.5) | 46 (12) | 0.2832  |
| <b>sex (F M)</b> | 11 21           | 10 23   | 8 24      | 0.7136  | 11 22                     | 8 23      | 10 23   | 0.8041  |

|                                         |                      |                        |                |                |                |                 |                  |        |
|-----------------------------------------|----------------------|------------------------|----------------|----------------|----------------|-----------------|------------------|--------|
| <b>center of the study (GR IT SR)</b>   | 9 17 6               | 14 7 12                | 15 6 11        | <b>0.02424</b> | 11 12 10       | 9 11 11         | 18 7 8           | 0.2578 |
| <b>smoking (Yes No)</b>                 | 8 24                 | 7 25                   | 6 26           | 0.8329         | 5 27           | 9 22            | 7 26             | 0.4341 |
| <b>BMI ***</b>                          | 32.51 (6.18)         | 34.21 (6.17)           | 33.08 (4.63)   | 0.7394         | 33.78 (4.41)   | 33.33 (7.16)    | 32.98 (6.89)     | 0.8633 |
| <b>PAL (total) ***</b>                  | 1323 (1114.12)       | 1701 (2378.25)         | 2310 (6326.75) | 0.1406         | 1959 (2837.25) | 1386 (1586.5)   | 1813.5 (5213.62) | 0.5262 |
| <b>FindRisk Score ***</b>               | 14 (5.5)             | 12 (3)                 | 13.5 (4)       | 0.09009        | 13 (6)         | 14 (4)          | 12 (3.25)        | 0.3044 |
| <b>cT1 (ms) ***</b>                     | 862.07 (82.85)       | 870.02 (69.86)         | 884.34 (83.61) | 0.2503         | 855.42 (73.46) | 876.57 (107.32) | 874.56 (93.91)   | 0.6181 |
| <b>PDFf (%) ***</b>                     | 17.13 (13.28)        | 12.34 (9.76)           | 11.07 (16.5)   | 0.3005         | 12.4 (13.61)   | 15.14 (13.61)   | 14.88 (14.64)    | 0.6684 |
| <b>LIF *</b>                            | 2.17 (±0.71)         | 2.2 (±0.58)            | 2.42 (±0.57)   | 0.232          | 2.14 (±0.62)   | 2.34 (±0.66)    | 2.31 (±0.61)     | 0.403  |
| <b>AST (IU/L)***</b>                    | 25 (12.5)            | 21 (6)                 | 24 (12.5)      | 0.05509        | 24.5 (11.25)   | 23 (9.5)        | 22 (11)          | 0.4289 |
| <b>ALT (IU/L)***</b>                    | 42 (32) <sup>^</sup> | 27 (11) <sup>^</sup> ‡ | 36 (24) ‡      | <b>0.02449</b> | 27 (24.25)     | 36 (26.5)       | 30 (23.5)        | 0.5363 |
| <b>AST/ALT ratio ***</b>                | 0.64 (0.23)          | 0.78 (0.25)            | 0.69 (0.28)    | 0.1432         | 0.7 (0.3)      | 0.66 (0.21)     | 0.7 (0.27)       | 0.6862 |
| <b>γ-gt (U/L) ***</b>                   | 36 (45)              | 31 (16.75)             | 32.5 (52.5)    | 0.1003         | 41 (32)        | 33 (17.5)       | 30.5 (25.75)     | 0.7913 |
| <b>Total cholesterol (mg/dL)***</b>     | 198.5 (29.5)         | 188.3 (52)             | 192.5 (44.5)   | 0.6382         | 202 (43)       | 198 (46)        | 187 (33)         | 0.6733 |
| <b>HDL (mg/dL)***</b>                   | 48.5 (15.5)          | 42 (11.3)              | 41 (11.45)     | 0.2686         | 43 (12)        | 44 (17.5)       | 41 (13.1)        | 0.9815 |
| <b>LDL (mg/dL)***</b>                   | 122.95 (28)          | 114.1 (41)             | 125 (42.3)     | 0.4991         | 125.5 (44.25)  | 128.8 (49.2)    | 117 (19)         | 0.6083 |
| <b>triglycerides (mg/dl)***</b>         | 131.5 (93.75)        | 138 (107)              | 133.45 (69.68) | 0.7657         | 134 (114)      | 129.3 (81.9)    | 136 (98)         | 0.8138 |
| <b>glucose (mg/dL) ***</b>              | 105 (14)             | 99.5 (12.9)            | 98 (12.8)      | 0.1106         | 100.9 (10.1)   | 103.7 (22.7)    | 100.8 (12)       | 0.8742 |
| <b>120 min-OGTT glucose (mg/dL) ***</b> | 121 (50.4)           | 117 (43.4)             | 129.6 (65.6)   | 0.7644         | 111 (43.2)     | 132.5 (62)      | 119 (46.4)       | 0.5656 |
| <b>HOMA-IR***</b>                       | 4.93 (4.07)          | 4.08 (2.53)            | 4.57 (3.12)    | 0.3886         | 4.08 (2.93)    | 5.03 (3.44)     | 4.53 (2.29)      | 0.8636 |
| <b>Insulin (μU/mL)***</b>               | 17.55 (14.35)        | 15.8 (7.4)             | 18 (9.27)      | 0.6377         | 14.1 (12.85)   | 17.4 (8.45)     | 18.55 (8.08)     | 0.5436 |

Note: The normality assumption was checked using the Shapiro-Wilk test.; \* parametric variable, \*\*\* non parametric variable.; Parametric quantitative variables are expressed as mean (± standard deviation (SD)), non-parametric quantitative variables as median (interquartile range (IQR)) and categorical variables as numbers.; P value was obtained using Kruskal-Wallis with Dunn's post-hoc test or ANOVA with Tukey's post-hoc test for continuous non parametric and parametric variables, respectively and chi-square test for categorical variables; †Differences between low and high tertile, ‡Differences between medium and high tertile, ^ Differences between low and medium tertile; PAL: physical activity level; FindRisk Score: Finnish Diabetic Risk Score; cT1: included iron-corrected; proton density fat fraction (PDFf); Liver Inflammation

Fibrosis score (LIF); AST: aspartate transaminase; ALT: alanine transaminase; AST/ALT ratio: AST to ALT ratio;  $\gamma$ -GT:  $\gamma$ -glutamyltransferase; HDL: High-density lipoprotein; LDL: Low-density lipoprotein; HOMA-IR: homeostatic model assessment of insulin resistance

**Table S2.** Cont.

| Variables                         | Plant-based pattern      |                          |                      |                | Low-Fat Dairy and Poultry pattern |                            |                   |                |
|-----------------------------------|--------------------------|--------------------------|----------------------|----------------|-----------------------------------|----------------------------|-------------------|----------------|
|                                   | Low                      | Medium                   | High                 | p-value        | Low                               | Medium                     | High              | p-value        |
| age ***                           | 47 (17)                  | 46 (15.5)                | 50 (9)               | 0.3569         | 46.5 (11.25)                      | 50 (17)                    | 50.5 (17.25)      | 0.5954         |
| sex (F M)                         | 6 27                     | 14 17                    | 9 24                 | 0.05739        | 5 27                              | 11 22                      | 13 19             | 0.07993        |
| center of the study<br>(GR IT SR) | 8 17 8                   | 14 7 10                  | 16 6 11              | <b>0.03439</b> | 12 11 9                           | 13 9 11                    | 13 10 9           | 0.973          |
| smoking (Yes No)                  | 8 25                     | 8 23                     | 5 27                 | 0.5712         | 9 23                              | 4 28                       | 8 24              | 0.278          |
| BMI ***                           | 32.04 (4.04)             | 33.28 (6.41)             | 34.72 (7.83)         | 0.1304         | 34.32 (6.62)                      | 32.93 (7.74)               | 32.91 (4.49)      | 0.8992         |
| PAL (total) ***                   | 1632 (4308)              | 1635 (2766)              | 1688.25<br>(1659.68) | 0.9832         | 1362 (1553.62)                    | 2185.5 (3231.75)           | 1748<br>(4725.75) | 0.2665         |
| FindRisk Score ***                | 13 (3.25)                | 13 (4)                   | 14 (4)               | 0.9089         | 13 (4)                            | 14 (7)                     | 13 (4.25)         | 0.6292         |
| cT1 (ms) ***                      | 870.02 (108.71)          | 849.73 (59.3)            | 878.88 (88.62)       | 0.1643         | 875.82 (115.07)                   | 843.86 (85.86)             | 874.04<br>(68.02) | 0.2274         |
| PDFF (%) ***                      | 15.82 (14.64)            | 10.94 (12.13)            | 16.55 (14.6)         | 0.2453         | 16.66 (18.91) <sup>Λ</sup>        | 11.02 (11.99) <sup>Λ</sup> | 14.16 (13.23)     | <b>0.04452</b> |
| LIF *                             | 2.24 (±0.68)             | 2.11 (±0.52)             | 2.42 (±0.64)         | 0.164          | 2.4 (±0.63)                       | 2.11 (±0.64)               | 2.27 (±0.6)       | 0.181          |
| AST (IU/L)***                     | 25 (14.5) <sup>Λ</sup>   | 19 (7.5) <sup>Λ</sup> ‡  | 24 (12) ‡            | <b>0.04727</b> | 25 (6.25)                         | 19 (12)                    | 24 (11)           | 0.1959         |
| ALT (IU/L)***                     | 41 (31) <sup>Λ</sup>     | 26 (17) <sup>Λ</sup> ‡   | 36 (21) ‡            | <b>0.0138</b>  | 38 (16.25)                        | 27 (15)                    | 30 (21)           | 0.06961        |
| AST/ALT ratio ***                 | 0.65 (0.25) <sup>Λ</sup> | 0.83 (0.31) <sup>Λ</sup> | 0.66 (0.17)          | <b>0.04029</b> | 0.64 (0.21)                       | 0.7 (0.28)                 | 0.72 (0.24)       | 0.1598         |
| $\gamma$ -gt (U/L) ***            | 37 (28)                  | 30 (19)                  | 32 (32)              | 0.2255         | 30.5 (25.75)                      | 31.5 (20.5)                | 36.5 (46.75)      | 0.4328         |
| Total cholesterol<br>(mg/dL)***   | 197 (40)                 | 204 (40)                 | 188.3 (55.7)         | 0.1722         | 186.5 (28.8)                      | 199 (46.8)                 | 200 (56.5)        | 0.2723         |
| HDL (mg/dL)***                    | 41 (13)                  | 45 (12.15)               | 44 (14)              | 0.3598         | 41 (10.07)                        | 45 (19.7)                  | 46.5 (13.5)       | 0.2692         |
| LDL (mg/dL)***                    | 118 (39)                 | 126 (40.3)               | 116.05 (42.55)       | 0.3144         | 117 (27.7)                        | 124.9 (56)                 | 121 (37.5)        | 0.4185         |
| triglycerides (mg/dl)***          | 159 (91.3)               | 132.9 (111)              | 130 (87)             | 0.8775         | 135 (70.58)                       | 121 (101.3)                | 141.5 (111)       | 0.5033         |
| glucose (mg/dL) ***               | 97 (18)                  | 104 (12)                 | 101.4 (10.85)        | 0.7956         | 102 (14)                          | 100.8 (14.9)               | 100.4 (13.15)     | 0.7549         |

|                                         |               |             |              |        |              |             |               |         |
|-----------------------------------------|---------------|-------------|--------------|--------|--------------|-------------|---------------|---------|
| <b>120 min-OGTT glucose (mg/dL) ***</b> | 129.3 (33.25) | 106 (38.7)  | 132.9 (74.9) | 0.1423 | 129.6 (44.8) | 129 (64)    | 106.5 (36.15) | 0.3122  |
| <b>HOMA-IR***</b>                       | 5.03 (3.81)   | 4.4 (2.92)  | 4.08 (2.7)   | 0.3624 | 5.59 (4.15)  | 4.65 (2.45) | 4.08 (2.11)   | 0.09498 |
| <b>Insulin (μU/mL)***</b>               | 18.3 (14.5)   | 15.7 (9.47) | 14.6 (7.25)  | 0.229  | 19.4 (14.6)  | 14.8 (9.25) | 16.1 (8.05)   | 0.06205 |

Note: The normality assumption was checked using the Shapiro-Wilk test.; \* parametric variable, \*\*\* non parametric variable.; Parametric quantitative variables are expressed as mean ( $\pm$  standard deviation (SD)), non-parametric quantitative variables as median (interquartile range (IQR)) and categorical variables as numbers.; P value was obtained using Kruskal-Wallis with Dunn's post-hoc test or ANOVA with Tukey's post-hoc test for continuous non parametric and parametric variables, respectively and chi-square test for categorical variables; †Differences between low and high tertile, ‡Differences between medium and high tertile,  $\wedge$  Differences between low and medium tertile; PAL: physical activity level; FindRisk Score: Finnish Diabetic Risk Score; cT1: included iron-corrected; proton density fat fraction (PDFF); Liver Inflammation Fibrosis score (LIF); AST: aspartate transaminase; ALT: alanine transaminase; AST/ALT ratio: AST to ALT ratio;  $\gamma$ -GT:  $\gamma$ -glutamyltransferase; HDL: High-density lipoprotein; LDL: Low-density lipoprotein; HOMA-IR: homeostatic model assessment of insulin resistance

**Table S3.** Daily energy and nutrients intake in different levels of the dietary patterns.

| Nutrients               | High-Sugar pattern     |                        |                       |                 |
|-------------------------|------------------------|------------------------|-----------------------|-----------------|
|                         | Low                    | Medium                 | High                  | p-value         |
| protein (g) ***         | 74.46 (51.56)          | 83.68 (47.38)          | 99.24 (41.25)         | 0.1947          |
| Total fat (g) ***       | 86.39 (43.48)          | 90.19 (42.14)          | 101.7 (43.35)         | 0.205           |
| carbohydrate (g) *      | 161.01 ( $\pm$ 51.96)  | 194.84 ( $\pm$ 55.66)  | 185.52 ( $\pm$ 68.74) | 0.0865          |
| kilocalories (kcal) *** | 1762.23 (1124.94)      | 1938.4 (683.7)         | 2109.59 (598.98)      | 0.2411          |
| Total sugar (g) ***     | 39.39 (31.81) $\wedge$ | 63.89 (33.38) $\wedge$ | 57.86 (31.91)         | <b>0.01003</b>  |
| glucose (g) ***         | 4.51 (6.48)† $\wedge$  | 10.81 (8.5) $\wedge$   | 8.84 (8.14)†          | <b>0.008712</b> |
| sucrose (g) ***         | 5.34 (13.28)           | 10.23 (16)             | 9.46 (9.41)           | 0.2254          |
| maltose (g) ***         | 1.12 (1.14)            | 1.01 (1.22)            | 1.14 (0.75)           | 0.6883          |
| fructose (g) ***        | 4.87 (7.75)† $\wedge$  | 12.22 (11.76) $\wedge$ | 10.84 (13.53)†        | <b>0.005621</b> |
| galactose (g) ***       | 0.04 (0.11)            | 0.01 (0.09)            | 0.01 (0.14)           | 0.6996          |
| lactose (g) ***         | 4.57 (10.29)           | 2.64 (6.4)             | 1.32 (4.8)            | 0.4118          |
| Amino acids             |                        |                        |                       |                 |
| alanine (mg) ***        | 2049.4 (2657.06)       | 2518.57 (1495.98)      | 2572.23 (1641.28)     | 0.6494          |

|                        |                   |                   |                    |                |
|------------------------|-------------------|-------------------|--------------------|----------------|
| arginine (mg) ***      | 2239.57 (3451.11) | 2731.37 (2252.37) | 2919.63 (2091.89)  | 0.5638         |
| aspartic acid (mg) *** | 3562.62 (4504.84) | 4820.44 (3048.28) | 4628.49 (3567.11)  | 0.5702         |
| cystine (mg) ***       | 611.6 (689.52)    | 685.12 (380.53)   | 732.07 (514.74)    | 0.8013         |
| glutamic acid (mg) *** | 9933.53 (8965.42) | 11051.6 (6623.87) | 10925.33 (7523.55) | 0.8137         |
| glycine (mg) ***       | 1782.95 (2639.51) | 2039.59 (1513.9)  | 2223.24 (1283.51)  | 0.6641         |
| histidine (mg) ***     | 1207.58 (1454.3)  | 1435.39 (990.82)  | 1506.43 (1433.53)  | 0.5898         |
| isoleucine (mg) ***    | 2056.04 (2316.82) | 2274.35 (1243.13) | 2290.56 (1818.09)  | 0.6489         |
| leucine (mg) ***       | 3483.69 (3754.15) | 3993.07 (2138)    | 4021.84 (3359.46)  | 0.6523         |
| lysine (mg) ***        | 2851.52 (3566.25) | 3379.38 (2228.43) | 3522.08 (3154.59)  | 0.6288         |
| methionine (mg) ***    | 993.39 (1262.38)  | 1101.66 (639.90)  | 1215.51 (900.52)   | 0.6342         |
| phenylalanine (mg) *** | 1975.25 (2127.38) | 2273.54 (1324.89) | 2398.32 (1914.1)   | 0.7037         |
| proline (mg) ***       | 3099.39 (2236.46) | 3599.5 (2315.64)  | 3151 (2516.46)     | 0.6852         |
| serine (mg) ***        | 1908.32 (2052.87) | 2330.56 (1631.12) | 2379.75 (1994.4)   | 0.7282         |
| threonine (mg) ***     | 1740.78 (1986.2)  | 2029.24 (1088.82) | 2028.52 (1463.21)  | 0.6502         |
| tryptophan (mg) ***    | 522.83 (584.51)   | 633.54 (339.65)   | 610.76 (499.11)    | 0.693          |
| tyrosine (mg) ***      | 1391.35 (1663.01) | 1677.18 (1082.89) | 1766.34 (1562.84)  | 0.6768         |
| valine (mg) ***        | 2299.18 (2441.84) | 2646.68 (1545.84) | 2631.68 (2174.05)  | 0.6926         |
| Lipids                 |                   |                   |                    |                |
| cholesterol (mg) ***   | 157.6 (209.43) †  | 205.22 (193.1)    | 259.42 (189.02) †  | <b>0.04234</b> |
| SFA (g) *              | 28.24 (± 11.22)   | 27.88 (± 12.18)   | 32.68 (± 11.48)    | 0.212          |
| Trans-FA (g) ***       | 0.31 (0.46)       | 0.26 (0.47)       | 0.27 (0.59)        | 0.6067         |
| MUFA (g) ***           | 38.61 (17.23)     | 35.98 (20.55)     | 39.87 (17.46)      | 0.7139         |
| Oleic acid (g) ***     | 28.88 (10.26)     | 30.77 (13.67)     | 30.25 (16.25)      | 0.9421         |
| PUFA (g) ***           | 12.96 (7.76)      | 12.12 (5.52) ‡    | 16.39 (11.69) ‡    | <b>0.03617</b> |
| Linolenic acid (g) *** | 0.81 (0.53)       | 0.86 (0.61)       | 1 (0.74)           | 0.4046         |
| Linoleic acid (g) ***  | 10.76 (5.88)      | 9.72 (6.88)       | 12.4 (8.91)        | 0.1335         |
| DHA (g) ***            | 0.04 (0.04)       | 0.04 (0.07)       | 0.01 (0.03)        | 0.09175        |

|                             |                   |                   |                   |                |
|-----------------------------|-------------------|-------------------|-------------------|----------------|
| EPA (g) ***                 | 0.01 (0.02)       | 0.01 (0.02)       | 0 (0.01)          | 0.1289         |
| Total Dietary Fiber (g) *** | 15.65 (11.39)     | 17.55 (11.35)     | 16.59 (9.62)      | 0.2215         |
| crude fiber (g) ***         | 2.41 (2.37)       | 3.59 (3.64)       | 2.84 (2.8)        | 0.1634         |
| insoluble fiber (g) ***     | 0.35 (1.14)       | 0.98 (1.24)       | 0.77 (1.65)       | 0.07685        |
| soluble fiber (g) ***       | 0.06 (0.19) †     | 0.31 (0.54)       | 0.13 (0.27) †     | <b>0.04174</b> |
| Minerals                    |                   |                   |                   |                |
| zinc (mg) ***               | 8.11 (5.14)       | 8.87 (4.6)        | 9.58 (6.22)       | 0.2396         |
| copper (mg) ***             | 0.96 (0.61)       | 0.96 (0.48)       | 0.93 (0.42)       | 0.95           |
| chromium (mg) ***           | 0.03 (0.04)       | 0.03 (0.04)       | 0.04 (0.03)       | 0.481          |
| selenium (µg) *             | 110.66 (± 42.99)  | 104.13 (± 43.77)  | 115.38 (± 35.98)  | 0.563          |
| manganese (mg) ***          | 1.62 (1.68)       | 2.16 (1.48)       | 1.96 (1.02)       | 0.5845         |
| magnesium (mg) ***          | 241.71 (119.99)   | 234.41 (135.13)   | 249.87 (104.47)   | 0.8628         |
| molybdenum (µg) ***         | 12.47 (31.73)     | 13.02 (31.6)      | 12.18 (10.37)     | 0.9975         |
| iron (mg) ***               | 13.89 (8.41)      | 14.38 (6.03)      | 14.03 (4.7)       | 0.8644         |
| iodine (µg) ***             | 3.94 (6.81)       | 7.2 (9.32)        | 9.75 (14.23)      | 0.6923         |
| calcium (mg) ***            | 674.79 (378.57)   | 869.33 (354.02)   | 790.22 (343.24)   | 0.3121         |
| fluoride (µg) ***           | 454.02 (1940.15)  | 334.08 (2358.13)  | 316.94 (792.01)   | 0.9457         |
| phosphorus (mg) ***         | 1009.6 (678.21)   | 1089.42 (453.06)  | 1258.43 (523.39)  | 0.4431         |
| potassium (mg) ***          | 2293.44 (885.95)  | 2181.58 (1010.54) | 2605.5 (1082.91)  | 0.3065         |
| sodium (mg) ***             | 1714.48 (1066.08) | 2225.17 (1153.11) | 2251.53 (978.45)  | 0.07366        |
| Vitamins                    |                   |                   |                   |                |
| Vitamin A (IU) ***          | 2199.16 (2776)    | 2683.28 (3655.17) | 4417.28 (8094.89) | 0.1459         |
| Vitamin A (RAE) (µg) ***    | 267.62 (197.25)   | 322.76 (296.2)    | 453.02 (517.23)   | 0.06012        |
| Vitamin A (RE) ***          | 415.74 (376.5)†   | 464.88 (545.08)   | 859.78 (903.88)†  | <b>0.04206</b> |
| Vitamin C (mg) ***          | 40.96 (29.24)     | 68.51 (107.94)    | 61.49 (63.94)     | 0.1084         |
| Vitamin D (µg) ***          | 2.14 (3.23)       | 1.94 (3.6)        | 2.51 (2.02)       | 0.7293         |
| Vitamin D (IU) ***          | 79.74 (121.05)    | 78.29 (130.25)    | 86.27 (85.04)     | 0.8984         |



|                                  |                  |                   |                   |        |
|----------------------------------|------------------|-------------------|-------------------|--------|
| Vitamin E (mg) ***               | 0.55 (1.15)      | 0.82 (1.02)       | 1.54 (2.09)       | 0.4508 |
| Vitamin E (IU) ***               | 0.68 (1.35)      | 0.78 (1.42)       | 1.84 (2.6)        | 0.3868 |
| Vitamin K (µg) ***               | 67.38 (55.21)    | 69.22 (59.74)     | 84.45 (85.15)     | 0.5982 |
| Cobalamin (Vitamin B12) (µg) *** | 3.59 (2.03)      | 3.4 (2.64)        | 3.62 (3.11)       | 0.8848 |
| biotin (µg) ***                  | 10.68 (10.7)     | 9.93 (10.63)      | 10.78 (6.15)      | 0.97   |
| thiamin (mg) ***                 | 1.22 (1.05)      | 1.41 (0.61)       | 1.62 (0.71)       | 0.2215 |
| niacin (mg) ***                  | 20.11 (16.3)     | 20.38 (11.14)     | 25.14 (13.13)     | 0.5791 |
| pantothenic (mg) ***             | 3.56 (1.97)      | 3.65 (1.32)       | 3.69 (3.15)       | 0.8946 |
| Pyridoxine (Vitamin B6) (mg) *** | 1.46 (0.87)      | 1.53 (0.9)        | 1.64 (0.9)        | 0.138  |
| Alpha-Carotene (µg)***           | 89.2 (237.49)    | 144.61 (566.66)   | 275.03 (800.29)   | 0.1988 |
| Beta-Carotene (µg)***            | 577.95 (1137.14) | 1082.14 (2680.29) | 1100.81 (3785.61) | 0.269  |
| Beta-Cryptoxanthin (µg) ***      | 12.9 (114.25)    | 61.71 (248.95)    | 36.42 (104.04)    | 0.1931 |
| Lutein (+ Zeaxanthin) (µg) ***   | 601.95 (761.61)  | 1008.71 (1416.83) | 837.57 (1484.78)  | 0.5419 |
| lycopene (µg) ***                | 1472.39 (2528)   | 2133.57 (4382.85) | 1955.8 (3657.39)  | 0.9489 |
| Folate (DFE) (µg) ***            | 284.68 (241.82)  | 360.39 (210.02)   | 324.88 (161.16)   | 0.2311 |
| Folate (Total) (µg) ***          | 237.09 (164.57)  | 293.12 (138.3)    | 262.54 (166.21)   | 0.2311 |
| riboflavin (mg) ***              | 1.55 (1.24)      | 1.59 (0.78)       | 1.69 (0.89)       | 0.6396 |
| Alpha-Tocopherol (mg) ***        | 7.59 (3.86)      | 7.93 (4.74)       | 9.39 (5.89)       | 0.144  |

Note: The normality assumption was checked using the Shapiro-Wilk test.; \* parametric variable, \*\*\* non parametric variable.; Parametric quantitative variables are expressed as mean ( $\pm$  standard deviation (SD)) and non-parametric quantitative variables as median (interquartile range (IQR)); P value was obtained using Kruskal-Wallis with Dunn's post-hoc test or ANOVA with Tukey's post-hoc test for continuous non parametric and parametric variables, respectively; †Differences between low and high tertile, ‡Differences between medium and high tertile. ∆ Differences between low and medium tertile.

Table S3. Cont.

| Nutrients               | Prudent pattern       |                       |                       |                |
|-------------------------|-----------------------|-----------------------|-----------------------|----------------|
|                         | Low                   | Medium                | High                  | p-value        |
| protein (g) ***         | 99.74 (53.45)         | 83.68 (39.91)         | 78.67 (37.05)         | 0.156          |
| Total fat (g) ***       | 104.91 (53.35)        | 101.43 (47.85)        | 87 (26.31)            | 0.236          |
| carbohydrate (g) *      | 194.99 ( $\pm$ 74.62) | 182.74 ( $\pm$ 49.39) | 165.49 ( $\pm$ 51.73) | 0.164          |
| kilocalories (kcal) *** | 2133.4 (666.83)       | 1959.6 (703.03)       | 1760.76 (649.54)      | 0.08794        |
| Total sugar (g) ***     | 60.56 (31.96)         | 61.63 (30.37)         | 42.69 (31.11)         | 0.07937        |
| glucose (g) ***         | 10.04 (9.38)          | 8.54 (8.17)           | 6.68 (7.14)           | 0.7148         |
| sucrose (g) ***         | 11.45 (16.96)         | 9.26 (11.98)          | 6.43 (9.25)           | 0.5719         |
| maltose (g) ***         | 1.11 (1.16)           | 1.14 (1.29)           | 1 (0.63)              | 0.3196         |
| fructose (g) ***        | 11.16 (15.19)         | 10.17 (9.58)          | 8.74 (15.03)          | 0.9347         |
| galactose (g) ***       | 0.01 (0.04) $\wedge$  | 0.09 (0.22) $\wedge$  | 0.02 (0.06)           | <b>0.03852</b> |
| lactose (g) ***         | 1.72 (6.12)           | 5.41 (7.46)           | 0.59 (5.08)           | 0.06544        |
| Amino acids             |                       |                       |                       |                |
| alanine (mg) ***        | 2694.49 (3252.74)     | 2629.86 (1644.43)     | 2118.33 (1391.23)     | 0.5601         |
| arginine (mg) ***       | 3092.77 (3194.58)     | 2978.43 (2352.71)     | 2345.64 (1943.49)     | 0.4958         |
| aspartic acid (mg) ***  | 4644.38 (4690.32)     | 4873.95 (3780.76)     | 3701.22 (2541.18)     | 0.444          |
| cystine (mg) ***        | 735.99 (659.19)       | 757.64 (385.9)        | 608.43 (346.76)       | 0.5132         |
| glutamic acid (mg) ***  | 11354.35 (8422.82)    | 11300.41 (7066.95)    | 9159.58 (6056.36)     | 0.3941         |
| glycine (mg) ***        | 2404.93 (2565.33)     | 2250 (1614.21)        | 1800.35 (1061.17)     | 0.4847         |
| histidine (mg) ***      | 1547.5 (1903.96)      | 1579.4 (1226.89)      | 1236.08 (836.25)      | 0.5069         |
| isoleucine (mg) ***     | 2571.15 (2868.49)     | 2347.62 (1406.95)     | 2017.95 (1306.99)     | 0.4975         |
| leucine (mg) ***        | 4274.06 (4812.98)     | 3993.07 (2380.7)      | 3376.28 (2229.53)     | 0.51           |
| lysine (mg) ***         | 3798.04 (5118.59)     | 3600.64 (2773.53)     | 3087.86 (2160.56)     | 0.5734         |
| methionine (mg) ***     | 1318.47 (1664.10)     | 1162.06 (903.52)      | 1036.09 (591.04)      | 0.5354         |
| phenylalanine (mg) ***  | 2534.96 (2373.44)     | 2359.57 (1426.72)     | 1975.25 (1224.36)     | 0.4595         |
| proline (mg) ***        | 3441.87 (2497.32)     | 3599.5 (2348.27)      | 3025.05 (1858.24)     | 0.3902         |
| serine (mg) ***         | 2466.3 (2090.57)      | 2446.9 (1573.51)      | 1908.32 (1570.38)     | 0.5285         |
| threonine (mg) ***      | 2189.7 (2364.33)      | 2057.57 (1210.06)     | 1711.9 (1111.92)      | 0.5014         |
| tryptophan (mg) ***     | 699.62 (625.96)       | 670.24 (359.06)       | 542.65 (330.5)        | 0.5104         |
| tyrosine (mg) ***       | 1796.03 (2101.56)     | 1758.21 (1458.56)     | 1405.41 (969.52)      | 0.4894         |

|                             |                       |                       |                       |         |
|-----------------------------|-----------------------|-----------------------|-----------------------|---------|
| valine (mg) ***             | 2797.26 (2902.7)      | 2652.68 (1535.75)     | 2220.59 (1509.71)     | 0.5483  |
| Lipids                      |                       |                       |                       |         |
| cholesterol (mg) ***        | 265.61 (242.32)       | 231.44 (197.22)       | 188.52 (197.6)        | 0.5786  |
| SFA (g) *                   | 32.15 ( $\pm$ 13.15)  | 29.95 ( $\pm$ 11.98)  | 26.75 ( $\pm$ 9.51)   | 0.203   |
| Trans-FA (g) ***            | 0.22 (0.35)           | 0.28 (0.62)           | 0.31 (0.57)           | 0.7397  |
| MUFA (g) ***                | 40.14 (15.53)         | 40.92 (21.17)         | 36.16 (15.62)         | 0.6583  |
| Oleic acid (g) ***          | 30.69 (13.18)         | 29.89 (17.9)          | 31.41 (15.07)         | 0.9188  |
| PUFA (g) ***                | 15.06 (9.34)          | 13.99 (8.43)          | 13.11 (7.28)          | 0.5029  |
| Linolenic acid (g) ***      | 0.96 (0.63)           | 0.85 (0.48)           | 1.08 (0.69)           | 0.6863  |
| Linoleic acid (g) ***       | 11.31 (5.49)          | 10.07 (7.77)          | 10.93 (5.66)          | 0.5205  |
| DHA (g) ***                 | 0.03 (0.05)           | 0.02 (0.04)           | 0.03 (0.09)           | 0.3888  |
| EPA (g) ***                 | 0.01 (0.02)           | 0.01 (0.01)           | 0.01 (0.02)           | 0.6206  |
| Total Dietary Fiber (g) *** | 16.56 (11.75)         | 15.76 (9.24)          | 16.28 (14.31)         | 0.5338  |
| crude fiber (g) ***         | 2.33 (2.74)           | 2.76 (2.62)           | 3.35 (3.9)            | 0.3724  |
| insoluble fiber (g) ***     | 0.77 (1.74)           | 0.88 (1.5)            | 0.49 (1.49)           | 0.5367  |
| soluble fiber (g) ***       | 0.14 (0.42)           | 0.16 (0.3)            | 0.08 (0.39)           | 0.6863  |
| Minerals                    |                       |                       |                       |         |
| zinc (mg) ***               | 9.92 (6.17)           | 8.87 (5.47)           | 8.76 (3.13)           | 0.7386  |
| copper (mg) ***             | 0.92 (0.47)           | 0.96 (0.43)           | 0.98 (0.58)           | 0.6293  |
| chromium (mg) ***           | 0.04 (0.03)           | 0.02 (0.03)           | 0.04 (0.04)           | 0.08595 |
| selenium ( $\mu$ g) *       | 111.27 ( $\pm$ 43.09) | 111.71 ( $\pm$ 41.86) | 107.01 ( $\pm$ 38.74) | 0.889   |
| manganese (mg) ***          | 2.06 (1.43)           | 1.96 (1.32)           | 1.68 (1.6)            | 0.5464  |
| magnesium (mg) ***          | 251.14 (127.67)       | 231.54 (112.51)       | 245.04 (172.75)       | 0.7512  |
| molybdenum ( $\mu$ g) ***   | 11.58 (10.82)         | 10.79 (22.87)         | 14.01 (32.02)         | 0.6124  |
| iron (mg) ***               | 14.02 (6.44)          | 12.63 (8.12)          | 14.75 (5.57)          | 0.6666  |
| iodine ( $\mu$ g) ***       | 4.5 (19.75)           | 5.22 (8.28)           | 5.83 (11.19)          | 0.857   |
| calcium (mg) ***            | 863.59 (525.95)       | 768.77 (307.59)       | 751.72 (275.56)       | 0.5301  |
| fluoride ( $\mu$ g) ***     | 169.05 (450.95)       | 438.26 (2405.9)       | 432.53 (1975.31)      | 0.093   |
| phosphorus (mg) ***         | 1229.34 (665.25)      | 1075.22 (530.02)      | 1126.8 (454.76)       | 0.4303  |
| potassium (mg) ***          | 2562.04 (1160.01)     | 2181.58 (941.84)      | 2468.09 (1063.26)     | 0.583   |
| sodium (mg) ***             | 2318.32 (1089.37)     | 2100.77 (1167.93)     | 2043.72 (915.86)      | 0.3878  |
| Vitamins                    |                       |                       |                       |         |
| Vitamin A (IU) ***          | 2405.9 (3533.26)      | 2934.74 (5660.69)     | 3636.52 (5472.72)     | 0.5298  |

|                                  |                   |                   |                   |        |
|----------------------------------|-------------------|-------------------|-------------------|--------|
| Vitamin A (RAE) (µg) ***         | 294.3 (332.33)    | 369.74 (278)      | 308.65 (388.42)   | 0.6979 |
| Vitamin A (RE) ***               | 403.26 (524.42)   | 484.87 (507.73)   | 679.05 (596.81)   | 0.5028 |
| Vitamin C (mg) ***               | 49.19 (66.77)     | 44.17 (61.58)     | 60.67 (68.83)     | 0.6242 |
| Vitamin D (µg) ***               | 2.18 (3.17)       | 2.79 (3.32)       | 2.19 (2.22)       | 0.5581 |
| Vitamin D (IU) ***               | 59.26 (127.17)    | 108.25 (115.29)   | 80.37 (108.88)    | 0.3191 |
| Vitamin E (mg) ***               | 1.09 (1.38)       | 0.31 (1.16)       | 0.82 (1.66)       | 0.3334 |
| Vitamin E (IU) ***               | 0.62 (1.61)       | 0.46 (1.73)       | 1.1 (2.27)        | 0.4353 |
| Vitamin K (µg) ***               | 56.11 (58.49)     | 70.85 (58.84)     | 85.11 (85.73)     | 0.2711 |
| Cobalamin (Vitamin B12) (µg) *** | 3.63 (2.83)       | 3.2 (2.05)        | 3.57 (2.66)       | 0.9548 |
| biotin (µg) ***                  | 10.8 (5.68)       | 9.45 (8.76)       | 10.65 (11.01)     | 0.7878 |
| thiamin (mg) ***                 | 1.66 (0.93)       | 1.64 (0.85)       | 1.35 (0.62)       | 0.2781 |
| niacin (mg) ***                  | 23.28 (17.76)     | 19.55 (13.49)     | 20.04 (11.48)     | 0.2629 |
| pantothenic (mg) ***             | 3.83 (2.2)        | 3.59 (2.14)       | 3.56 (1.94)       | 0.7108 |
| Pyridoxine (Vitamin B6) (mg) *** | 1.7 (1.45)        | 1.43 (0.75)       | 1.62 (0.74)       | 0.1464 |
| Alpha-Carotene (µg)***           | 150.4 (256.3)     | 159.45 (926.9)    | 118.12 (504.84)   | 0.503  |
| Beta-Carotene (µg)***            | 701.98 (1793.47)  | 1122.85 (3264.89) | 1001.74 (2892.92) | 0.6092 |
| Beta-Cryptoxanthin (µg) ***      | 10.71 (216.17)    | 81.2 (176.06)     | 36.72 (85.11)     | 0.6427 |
| Lutein (+ Zeaxanthin) (µg) ***   | 780.5 (1143.24)   | 1008.71 (1157.6)  | 702.49 (1593.43)  | 0.76   |
| lycopene (µg) ***                | 1099.39 (3429.34) | 1857.86 (4087.54) | 1711.41 (3327.42) | 0.3552 |
| Folate (DFE) (µg) ***            | 319.38 (170.7)    | 332.96 (215.89)   | 371.18 (267.01)   | 0.7513 |
| Folate (Total) (µg) ***          | 255.79 (107.95)   | 283.09 (178.45)   | 311.63 (231.61)   | 0.8042 |
| riboflavin (mg) ***              | 1.68 (1.15)       | 1.56 (1.09)       | 1.66 (0.72)       | 0.8107 |
| Alpha-Tocopherol (mg) ***        | 8.94 (4.54)       | 7.92 (6.58)       | 7.96 (4.4)        | 0.717  |

Note: The normality assumption was checked using the Shapiro-Wilk test.; \* parametric variable, \*\*\* non parametric variable.; Parametric quantitative variables are expressed as mean ( $\pm$  standard deviation (SD)) and non-parametric quantitative variables as median (interquartile range (IQR)); P value was obtained using Kruskal-Wallis with Dunn's post-hoc test or ANOVA with Tukey's post-hoc test for continuous non parametric and parametric variables, respectively; †Differences between low and high tertile, ‡Differences between medium and high tertile. ∆ Differences between low and medium tertile.

Table S3. Cont.

| Western pattern         |                       |                      |                       |         |
|-------------------------|-----------------------|----------------------|-----------------------|---------|
| Nutrients               | Low                   | Medium               | High                  | p-value |
| protein (g) ***         | 81.39 (36.52)         | 96.87 (52.17)        | 97.44 (64.81)         | 0.4555  |
| Total fat (g) ***       | 89.89 (38.61)         | 98.6 (44.85)         | 101.7 (39.58)         | 0.4902  |
| carbohydrate (g) *      | 184.63 ( $\pm$ 63.27) | 176.9 ( $\pm$ 55.14) | 181.28 ( $\pm$ 63.97) | 0.885   |
| kilocalories (kcal) *** | 1811.87 (532.82)      | 2044.97 (1055.28)    | 2077.82 (762)         | 0.4729  |
| Total sugar (g) ***     | 62.63 (31.47)         | 59.1 (39.44)         | 51.02 (37.83)         | 0.4372  |
| glucose (g) ***         | 10.8 (8.91)           | 7.32 (8.17)          | 6.77 (6.61)           | 0.1653  |
| sucrose (g) ***         | 9.21 (10.32)          | 12.04 (14.9)         | 6.15 (14.33)          | 0.3743  |
| maltose (g) ***         | 0.96 (1.03)           | 1.07 (0.71)          | 1.36 (1)              | 0.2107  |
| fructose (g) ***        | 12.44 (13.01)         | 8.61 (14.46)         | 8.86 (7.79)           | 0.1244  |
| galactose (g) ***       | 0.03 (0.21)           | 0.02 (0.08)          | 0.02 (0.09)           | 0.6883  |
| lactose (g) ***         | 2.12 (5.54)           | 2.51 (6.49)          | 1.72 (6.65)           | 0.7513  |
| Amino acids             |                       |                      |                       |         |
| alanine (mg) ***        | 2026.68 (908.39)      | 2792.07 (2421.38)    | 2558.98 (2858.13)     | 0.1956  |
| arginine (mg) ***       | 2212.67 (1018.99)     | 3139.43 (2880.97)    | 2913.86 (2972.27)     | 0.1234  |
| aspartic acid (mg) ***  | 3701.22 (1588.1)      | 5416.59 (3831.69)    | 4752.96 (4482.39)     | 0.1405  |
| cystine (mg) ***        | 581.74 (411.58)       | 779.86 (514.95)      | 732.07 (601.24)       | 0.1014  |
| glutamic acid (mg) ***  | 8806.78 (5975.86)     | 11300.41 (8011.08)   | 11354.35 (8169)       | 0.07829 |
| glycine (mg) ***        | 1756.36 (656.5)       | 2425.88 (1696.13)    | 2386.15 (2375.81)     | 0.1768  |
| histidine (mg) ***      | 1236.88 (658.32)      | 1787.36 (1303.11)    | 1600.43 (1669.56)     | 0.1699  |
| isoleucine (mg) ***     | 2002.97 (1180.13)     | 2687.32 (2092.19)    | 2440.25 (2269.61)     | 0.2     |
| leucine (mg) ***        | 3376.28 (1785.96)     | 4619.62 (3451.67)    | 4367.89 (3999.92)     | 0.1708  |
| lysine (mg) ***         | 2955.28 (1479.43)     | 4153.71 (3018.05)    | 3494.39 (4219.39)     | 0.2111  |
| methionine (mg) ***     | 982.39 (552.10)       | 1343.35 (935.06)     | 1202.89 (1349.77)     | 0.2146  |

|                             |                   |                   |                   |         |
|-----------------------------|-------------------|-------------------|-------------------|---------|
| phenylalanine (mg) ***      | 1902.65 (1046.62) | 2632.84 (1903.92) | 2592.83 (2125.99) | 0.1209  |
| proline (mg) ***            | 2767.53 (2058.83) | 3599.5 (1452.32)  | 3497.08 (2350.54) | 0.1397  |
| serine (mg) ***             | 1884.32 (1196.92) | 2620.01 (1679.92) | 2642.93 (2224.65) | 0.08715 |
| threonine (mg) ***          | 1711.9 (777.92)   | 2366.87 (1683.54) | 2153.57 (1997.19) | 0.1965  |
| tryptophan (mg) ***         | 509.27 (317.35)   | 711.09 (535.33)   | 676.51 (551.84)   | 0.1425  |
| tyrosine (mg) ***           | 1405.41 (766.11)  | 1950.9 (1461.35)  | 1959.33 (1945.98) | 0.1946  |
| valine (mg) ***             | 2220.59 (1273.79) | 3162.98 (2172.47) | 2812.21 (2604.39) | 0.1889  |
| Lipids                      |                   |                   |                   |         |
| cholesterol (mg) ***        | 202.35 (177.7)    | 249.98 (246.5)    | 227.41 (196.61)   | 0.3088  |
| SFA (g) *                   | 28.78 (± 10.17)   | 30.38 (± 13.45)   | 29.77 (± 11.85)   | 0.868   |
| Trans-FA (g) ***            | 0.31 (0.58)       | 0.21 (0.3)        | 0.37 (0.62)       | 0.2512  |
| MUFA (g) ***                | 35.79 (16.03)     | 40.92 (20.13)     | 40.97 (17.74)     | 0.373   |
| Oleic acid (g) ***          | 29.35 (14.34)     | 30.12 (19.12)     | 31.6 (10.27)      | 0.626   |
| PUFA (g) ***                | 13.45 (5.44)      | 15.58 (7.67)      | 14.06 (10.51)     | 0.383   |
| Linolenic acid (g) ***      | 1.03 (0.75)       | 0.86 (0.52)       | 0.88 (0.76)       | 0.6267  |
| Linoleic acid (g) ***       | 10.93 (5.21)      | 11.56 (10.01)     | 11.08 (7.02)      | 0.1699  |
| DHA (g) ***                 | 0.02 (0.04)       | 0.04 (0.06)       | 0.02 (0.08)       | 0.2672  |
| EPA (g) ***                 | 0.01 (0.01)       | 0.02 (0.02)       | 0.01 (0.03)       | 0.8217  |
| Total Dietary Fiber (g) *** | 16.6 (10.42)      | 16.7 (13.74)      | 15.68 (9.02)      | 0.5673  |
| crude fiber (g) ***         | 2.89 (2.74)       | 3.23 (2.95)       | 2.17 (2.96)       | 0.6959  |
| insoluble fiber (g) ***     | 0.53 (0.84)       | 0.8 (1.53)        | 0.93 (1.73)       | 0.8177  |
| soluble fiber (g) ***       | 0.12 (0.28)       | 0.16 (0.56)       | 0.04 (0.43)       | 0.5371  |
| Minerals                    |                   |                   |                   |         |
| zinc (mg) ***               | 8.53 (3.55)       | 9.7 (7.28)        | 9.59 (4.52)       | 0.5955  |
| copper (mg) ***             | 0.93 (0.52)       | 1.01 (0.49)       | 0.91 (0.47)       | 0.6231  |
| chromium (mg) ***           | 0.03 (0.04)       | 0.03 (0.03)       | 0.04 (0.04)       | 0.7673  |
| selenium (µg) *             | 106.05 (± 38.48)  | 111.82 (± 43.08)  | 112.55 (± 42.26)  | 0.796   |

|                                  |                       |                     |                     |                 |
|----------------------------------|-----------------------|---------------------|---------------------|-----------------|
| manganese (mg) ***               | 1.86 (1.34)           | 2.05 (1.81)         | 1.79 (1.16)         | 0.9669          |
| magnesium (mg) ***               | 243.35 (119.27)       | 234.41 (144.83)     | 247.89 (115.41)     | 0.7162          |
| molybdenum (µg) ***              | 14.54 (38.6)          | 12.18 (23.85)       | 11.99 (10.37)       | 0.5234          |
| iron (mg) ***                    | 14.14 (5.67)          | 13.12 (7.49)        | 14.7 (7.79)         | 0.7626          |
| iodine (µg) ***                  | 8.54 (9.55) † ‡       | 7.2 (8.79) ‡        | 1.38 (4.47) †       | <b>0.007605</b> |
| calcium (mg) ***                 | 785.09 (466.31)       | 860.98 (433.43)     | 788.61 (290.27)     | 0.8876          |
| fluoride (µg) ***                | 304.12 (1812.93)      | 457.07 (2444.13)    | 309.75 (1714.08)    | 0.471           |
| phosphorus (mg) ***              | 1075.38 (539.15)      | 1268.39 (835.3)     | 1151.14 (436.12)    | 0.7482          |
| potassium (mg) ***               | 2363.2 (1034.93)      | 2414.04 (1337.51)   | 2414.93 (1095.88)   | 0.6363          |
| sodium (mg) ***                  | 2045.51 (951.99)      | 2298.86 (1339.03)   | 2136.57 (896.47)    | 0.9447          |
| Vitamins                         |                       |                     |                     |                 |
| Vitamin A (IU) ***               | 6382.69 (8197.71) † ‡ | 2953.99 (4472.87) † | 1949.61 (1201.88) † | <b>0.000329</b> |
| Vitamin A (RAE) (µg) ***         | 494.77 (451.33) † ‡   | 302.09 (280.74) †   | 248.02 (135.24) †   | <b>0.000451</b> |
| Vitamin A (RE) ***               | 822.59 (772.66) † ‡   | 481.89 (443.18) †   | 370.68 (195.69) †   | <b>0.000387</b> |
| Vitamin C (mg) ***               | 55.38 (59.73)         | 57.03 (63.43)       | 38.12 (71.01)       | 0.3145          |
| Vitamin D (µg) ***               | 2.33 (2.4)            | 2.1 (3.2)           | 2.15 (3.01)         | 0.6516          |
| Vitamin D (IU) ***               | 81.39 (110.16)        | 79.97 (122.35)      | 79.74 (115.13)      | 0.7426          |
| Vitamin E (mg) ***               | 0.34 (1.2)            | 0.83 (1.62)         | 1.09 (1.52)         | 0.2825          |
| Vitamin E (IU) ***               | 0.5 (1.79)            | 1.06 (2.01)         | 0.92 (1.58)         | 0.8507          |
| Vitamin K (µg) ***               | 94.75 (97.54) † ‡     | 67.09 (31.43) †     | 56.11 (46.01) †     | <b>0.03973</b>  |
| Cobalamin (Vitamin B12) (µg) *** | 3.73 (2.79)           | 3.42 (2.76)         | 3.59 (2.22)         | 0.9653          |
| biotin (µg) ***                  | 11.73 (9.46)          | 9.56 (9.63)         | 8.15 (9.96)         | 0.4747          |
| thiamin (mg) ***                 | 1.34 (0.58)           | 1.66 (1.06)         | 1.69 (0.86)         | 0.21            |
| niacin (mg) ***                  | 18.61 (10.32)         | 25.88 (15.22)       | 22.92 (16.98)       | 0.2185          |
| pantothenic (mg) ***             | 3.11 (1.94)           | 3.86 (2.21)         | 3.8 (1.21)          | 0.4514          |

|                                  |                    |                   |                   |                 |
|----------------------------------|--------------------|-------------------|-------------------|-----------------|
| Pyridoxine (Vitamin B6) (mg) *** | 1.46 (0.65)        | 1.77 (1.05)       | 1.55 (1.07)       | 0.4182          |
| Alpha-Carotene (µg)***           | 484.94 (1161.97) † | 158.03 (384.28)   | 96.55 (136.13) †  | <b>0.02059</b>  |
| Beta-Carotene (µg)***            | 3141.32 (3893.01)† | 1122.85 (2539.55) | 549.4 (639.54)†   | <b>0.00293</b>  |
| Beta-Cryptoxanthin (µg) ***      | 25.95 (79.17)      | 35.77 (175.04)    | 42.33 (220.41)    | 0.6338          |
| Lutein (+ Zeaxanthin) (µg) ***   | 1227.21 (1736.94)† | 844.63 (1157.6)‡  | 484.85 (633.56)†‡ | <b>0.001501</b> |
| lycopene (µg) ***                | 1694.96 (3306.3)   | 1412.71 (3908.48) | 1711.41 (4467.85) | 0.8859          |
| Folate (DFE) (µg) ***            | 371.18 (307.43)    | 309.2 (191.08)    | 295.5 (217.51)    | 0.4525          |
| Folate (Total) (µg) ***          | 304.15 (214.83)    | 259.06 (154.65)   | 256.35 (129.61)   | 0.6209          |
| riboflavin (mg) ***              | 1.66 (0.72)        | 1.57 (1.17)       | 1.61 (1.13)       | 0.8937          |
| Alpha-Tocopherol (mg) ***        | 8.99 (2.86)        | 7.04 (8.37)       | 8.52 (4.18)       | 0.5452          |

Note: The normality assumption was checked using the Shapiro-Wilk test.; \* parametric variable, \*\*\* non parametric variable.; Parametric quantitative variables are expressed as mean ( $\pm$  standard deviation (SD)) and non-parametric quantitative variables as median (interquartile range (IQR)); P value was obtained using Kruskal-Wallis with Dunn's post-hoc test or ANOVA with Tukey's post-hoc test for continuous non parametric and parametric variables, respectively; †Differences between low and high tertile, ‡Differences between medium and high tertile. Δ Differences between low and medium tertile.

**Table S3. Cont.**

| High-Fat and Salt pattern |                       |                       |                       |         |
|---------------------------|-----------------------|-----------------------|-----------------------|---------|
| Nutrients                 | Low                   | Medium                | High                  | p-value |
| protein (g) ***           | 78.34 (43.66)         | 103.39 (49.3)         | 88.78 (49.97)         | 0.1311  |
| Total fat (g) ***         | 79.86 (44.9)          | 99.51 (35.73)         | 98.61 (39.27)         | 0.06888 |
| carbohydrate (g) *        | 172.94 ( $\pm$ 65.37) | 179.67 ( $\pm$ 63.47) | 190.29 ( $\pm$ 52.39) | 0.543   |
| kilocalories (kcal) ***   | 1638.67 (879.21)      | 2014.58 (668.75)      | 1974.61 (769.39)      | 0.112   |



|                        |                   |                    |                    |        |
|------------------------|-------------------|--------------------|--------------------|--------|
| Total sugar (g) ***    | 58.32 (39.98)     | 56.79 (37.44)      | 54.77 (32.37)      | 0.9644 |
| glucose (g) ***        | 8.4 (11.71)       | 5.72 (8.52)        | 8.88 (6.93)        | 0.2593 |
| sucrose (g) ***        | 9.66 (15.59)      | 8.35 (16.07)       | 8.59 (10.4)        | 0.7767 |
| maltose (g) ***        | 1.11 (0.76)       | 0.88 (1.01)        | 1.21 (1.2)         | 0.2871 |
| fructose (g) ***       | 10.5 (16.02)      | 7.66 (8.97)        | 10.3 (10.45)       | 0.2179 |
| galactose (g) ***      | 0.02 (0.08)       | 0.01 (0.07)        | 0.04 (0.14)        | 0.1465 |
| lactose (g) ***        | 2.51 (6.67)       | 1.09 (6.03)        | 2.64 (6.75)        | 0.9087 |
| Amino acids            |                   |                    |                    |        |
| alanine (mg) ***       | 2294.58 (1412.5)  | 2596.22 (2207.71)  | 2500.43 (2356.74)  | 0.5348 |
| arginine (mg) ***      | 2443.7 (1840.23)  | 2685.31 (2617.04)  | 2879.44 (2427.72)  | 0.6016 |
| aspartic acid (mg) *** | 4374.41 (2637.64) | 4664.19 (3553.33)  | 4647.87 (4103.66)  | 0.6378 |
| cystine (mg) ***       | 613.78 (414.68)   | 700.39 (565.22)    | 737.48 (565.2)     | 0.4941 |
| glutamic acid (mg) *** | 9913.69 (5424.45) | 11042.13 (8396.74) | 11104.19 (7870.07) | 0.4093 |
| glycine (mg) ***       | 1914.91 (1307.92) | 2064.51 (1766.44)  | 2222.83 (1860.1)   | 0.6303 |
| histidine (mg) ***     | 1369.05 (1032.48) | 1466.06 (1280.75)  | 1459.47 (1436.64)  | 0.5146 |
| isoleucine (mg) ***    | 2079.34 (1327.21) | 2242.27 (1968.31)  | 2299.87 (1915.1)   | 0.4861 |
| leucine (mg) ***       | 3759 (2421.38)    | 3977.2 (3404.66)   | 3846.3 (3455.12)   | 0.4567 |
| lysine (mg) ***        | 3237.88 (2525.33) | 3662.4 (2987.31)   | 3459.23 (3530.06)  | 0.5415 |
| methionine (mg) ***    | 1050.81 (767.06)  | 1198.88 (966.71)   | 1149.45 (1233.71)  | 0.6034 |
| phenylalanine (mg) *** | 2074.38 (1251.17) | 2137.97 (2054.21)  | 2355.43 (1767.93)  | 0.3981 |
| proline (mg) ***       | 3044.22 (1799.93) | 3371.79 (2407.18)  | 3512.12 (2158.84)  | 0.3325 |
| serine (mg) ***        | 2172.49 (1277.12) | 2314.36 (1920.76)  | 2245.92 (1884.65)  | 0.3842 |
| threonine (mg) ***     | 1942.93 (1214.99) | 2037.13 (1608.3)   | 2022.06 (1737.06)  | 0.5161 |
| tryptophan (mg) ***    | 553.9 (362.12)    | 595.67 (526.88)    | 656.78 (511.63)    | 0.3933 |
| tyrosine (mg) ***      | 1581.27 (929.61)  | 1671.16 (1615.68)  | 1628.62 (1451.95)  | 0.5149 |
| valine (mg) ***        | 2405.35 (1565.65) | 2571.35 (2395.61)  | 2566.27 (2129.73)  | 0.4223 |
| Lipids                 |                   |                    |                    |        |

|                             |                           |                          |                          |                 |
|-----------------------------|---------------------------|--------------------------|--------------------------|-----------------|
| cholesterol (mg) ***        | 195.56 (136.88)           | 257.33 (268.7)           | 232.2 (186.71)           | 0.1147          |
| SFA (g) *                   | 25.5 (± 9.95)             | 32.32 (± 11.25)          | 30.88 (± 13.01)          | 0.0617          |
| Trans-FA (g) ***            | 0.15 (0.24) <sup>Δ†</sup> | 0.35 (0.72) <sup>Δ</sup> | 0.46 (0.58) <sup>†</sup> | <b>0.002135</b> |
| MUFA (g) ***                | 32.27 (23.47)             | 41.66 (12.88)            | 39.55 (19.75)            | 0.1321          |
| Oleic acid (g) ***          | 23.09 (15.1)              | 33.19 (12.48)            | 29.68 (11.19)            | 0.07164         |
| PUFA (g) ***                | 14.55 (6.36)              | 15.02 (5.91)             | 14.01 (9.54)             | 0.6124          |
| Linolenic acid (g) ***      | 0.86 (0.54)               | 0.9 (0.68)               | 0.99 (0.66)              | 0.6813          |
| Linoleic acid (g)***        | 11.33 (6.19)              | 11.21 (6.02)             | 10.68 (5.75)             | 0.6986          |
| DHA (g) ***                 | 0.02 (0.04)               | 0.04 (0.07)              | 0.03 (0.14)              | 0.1784          |
| EPA (g) ***                 | 0.01 (0.02)               | 0.01 (0.02)              | 0.01 (0.07)              | 0.5602          |
| Total Dietary Fiber (g) *** | 17.55 (10.5)              | 14.1 (12.15)             | 15.75 (9.7)              | 0.9921          |
| crude fiber (g) ***         | 3.23 (3.03)               | 2.25 (2.76)              | 2.97 (2.78)              | 0.7364          |
| insoluble fiber (g) ***     | 0.5 (1.56)                | 0.58 (1.87)              | 0.77 (1.43)              | 0.6859          |
| soluble fiber (g) ***       | 0.14 (0.28)               | 0.13 (0.42)              | 0.13 (0.45)              | 0.8722          |
| Minerals                    |                           |                          |                          |                 |
| zinc (mg) ***               | 8.58 (4.32)               | 10.69 (6.46)             | 9.14 (4.73)              | 0.1352          |
| copper (mg) ***             | 0.96 (0.43)               | 0.93 (0.51)              | 0.98 (0.49)              | 0.8404          |
| chromium (mg) ***           | 0.04 (0.04)               | 0.03 (0.03)              | 0.04 (0.03)              | 0.2449          |
| selenium (μg) *             | 99.69 (± 38.48)           | 116.9 (± 41.67)          | 113 (± 41.63)            | 0.241           |
| manganese (mg) ***          | 1.72 (1.34)               | 1.96 (1.07)              | 1.94 (1.64)              | 0.706           |
| magnesium (mg) ***          | 242.9 (153.81)            | 239.11 (100.12)          | 254.17 (116.39)          | 0.7511          |
| molybdenum (μg) ***         | 13.16 (30.52)             | 10.79 (29.76)            | 13.58 (16.72)            | 0.7835          |
| iron (mg) ***               | 11.74 (7.15)              | 14.31 (6.4)              | 14.57 (8.11)             | 0.09348         |
| iodine (μg) ***             | 6.85 (9.45)               | 5.03 (11.93)             | 4.93 (8.53)              | 0.9545          |
| calcium (mg) ***            | 722.6 (409.65)            | 846.86 (487.97)          | 845.27 (348.86)          | 0.4507          |
| fluoride (μg) ***           | 411.93 (5187.09)          | 273.08 (2553.03)         | 362.31 (545.97)          | 0.5384          |
| phosphorus (mg) ***         | 920.33 (525.59)           | 1226.24 (552.54)         | 1150.27 (449.81)         | 0.2426          |

|                                     |                   |                   |                   |         |
|-------------------------------------|-------------------|-------------------|-------------------|---------|
| potassium (mg) ***                  | 2415.86 (1075.97) | 2345.19 (884.08)  | 2365.15 (1120.2)  | 0.7772  |
| sodium (mg) ***                     | 1748.31 (1051.08) | 2339.78 (633.93)  | 2245.45 (1198.26) | 0.09452 |
| Vitamins                            |                   |                   |                   |         |
| Vitamin A (IU) ***                  | 3867.95 (5139.67) | 2704.66 (4766.89) | 2405.13 (4404.59) | 0.6296  |
| Vitamin A (RAE) (µg) ***            | 382.96 (277.08)   | 319.52 (429.96)   | 267.62 (314.97)   | 0.4104  |
| Vitamin A (RE) ***                  | 617.44 (555.28)   | 522.97 (528.91)   | 411.67 (614.79)   | 0.6382  |
| Vitamin C (mg) ***                  | 86.58 (102.43)    | 47.61 (51.63)     | 44.11 (56.38)     | 0.2573  |
| Vitamin D (µg) ***                  | 2.03 (2.71)       | 2.13 (3.31)       | 2.93 (2.55)       | 0.7844  |
| Vitamin D (IU) ***                  | 62.72 (95.04)     | 74.59 (127.16)    | 109.33 (100.61)   | 0.3808  |
| Vitamin E (mg) ***                  | 0.7 (0.98)        | 0.7 (1.48)        | 0.82 (1.64)       | 0.3866  |
| Vitamin E (IU) ***                  | 0.54 (1.47)       | 0.48 (1.91)       | 1.02 (1.72)       | 0.2038  |
| Vitamin K (µg) ***                  | 73.41 (112.86)    | 66.99 (47.37)     | 68.45 (65.18)     | 0.3239  |
| Cobalamin (Vitamin B12)<br>(µg) *** | 3.4 (1.75)        | 3.51 (3.66)       | 3.82 (2.34)       | 0.432   |
| biotin (µg) ***                     | 10.65 (8.35)      | 8.79 (9.69)       | 11.51 (10.24)     | 0.9215  |
| thiamin (mg) ***                    | 1.34 (0.76)       | 1.64 (0.79)       | 1.37 (0.86)       | 0.5773  |
| niacin (mg) ***                     | 19.55 (11.72)     | 21.46 (13.86)     | 22.73 (17.96)     | 0.6509  |
| pantothenic (mg) ***                | 3.63 (2.18)       | 3.66 (2.33)       | 3.57 (2.37)       | 0.5595  |
| Pyridoxine (Vitamin B6)<br>(mg) *** | 1.54 (1.01)       | 1.6 (0.86)        | 1.51 (0.97)       | 0.885   |
| Alpha-Carotene (µg)***              | 190 (540.05)      | 174.07 (606.85)   | 90.52 (293.99)    | 0.287   |
| Beta-Carotene (µg)***               | 1156.67 (3106.99) | 955.93 (2719.11)  | 736.62 (2484.36)  | 0.4048  |
| Beta-Cryptoxanthin (µg) ***         | 93.67 (153.41)    | 34.45 (134.13)    | 12.7 (73.96)      | 0.4264  |
| Lutein (+ Zeaxanthin) (µg)<br>***   | 844.63 (1257.84)  | 721.19 (728.04)   | 708.04 (1535.33)  | 0.5777  |
| lycopene (µg) ***                   | 1300.81 (3433.08) | 1849.15 (3160.32) | 1857.98 (3780.65) | 0.7103  |

|                           |                 |                 |                 |        |
|---------------------------|-----------------|-----------------|-----------------|--------|
| Folate (DFE) (μg) ***     | 318.11 (233.85) | 344.07 (271.78) | 291.12 (190.17) | 0.5795 |
| Folate (Total) (μg) ***   | 261.98 (174.92) | 288.11 (178.19) | 268.68 (151.81) | 0.7836 |
| riboflavin (mg) ***       | 1.53 (0.72)     | 1.67 (1.08)     | 1.65 (1.04)     | 0.2017 |
| Alpha-Tocopherol (mg) *** | 6.92 (4.27)     | 8.42 (4.73)     | 8.94 (3.46)     | 0.4339 |

Note: The normality assumption was checked using the Shapiro-Wilk test.; \* parametric variable, \*\*\* non parametric variable.; Parametric quantitative variables are expressed as mean (± standard deviation (SD)) and non-parametric quantitative variables as median (interquartile range (IQR)); P value was obtained using Kruskal-Wallis with Dunn's post-hoc test or ANOVA with Tukey's post-hoc test for continuous non parametric and parametric variables, respectively; †Differences between low and high tertile, ‡Differences between medium and high tertile. Δ Differences between low and medium tertile.

**Table S3.** Cont.

| Plant-based pattern     |                  |                   |                   |                |
|-------------------------|------------------|-------------------|-------------------|----------------|
| Nutrients               | Low              | Medium            | High              | p-value        |
| protein (g) ***         | 83.39 (46.53)    | 97.12 (59.32)     | 90.06 (41.98)     | 0.4334         |
| Total fat (g) ***       | 90.83 (44.92)    | 98.38 (42.71)     | 98.6 (39.85)      | 0.475          |
| carbohydrate (g) *      | 165.59 (± 48.56) | 180.89 (± 56.9)   | 197.16 (± 70.92)  | 0.116          |
| kilocalories (kcal) *** | 1746.22 (798.9)  | 2078.76 (667.89)  | 1911.71 (717.21)  | 0.2124         |
| Total sugar (g) ***     | 50.55 (33.73)    | 58.14 (34.43)     | 63.57 (31.09)     | 0.101          |
| glucose (g) ***         | 6.52 (7.33)      | 6.77 (7.66)       | 10.37 (9.59)      | 0.1844         |
| sucrose (g) ***         | 5.01 (12.48)†    | 7.46 (9.6) ‡      | 12.07 (14.71)† ‡  | <b>0.01567</b> |
| maltose (g) ***         | 1.01 (0.71)      | 1.11 (1.07)       | 1.28 (1.46)       | 0.3777         |
| fructose (g) ***        | 9.09 (9.1)       | 8.86 (14.91)      | 13.06 (13.84)     | 0.1069         |
| galactose (g) ***       | 0.01 (0.1)       | 0.01 (0.07)       | 0.04 (0.18)       | 0.4291         |
| lactose (g) ***         | 0.71 (5.82)      | 4.88 (6.76)       | 3.29 (5.99)       | 0.2927         |
| Amino acids             |                  |                   |                   |                |
| alanine (mg) ***        | 1993.34 (1994)   | 2647.96 (2289.32) | 2294.58 (1714.32) | 0.5555         |

|                        |                   |                    |                    |         |
|------------------------|-------------------|--------------------|--------------------|---------|
| arginine (mg) ***      | 2083.16 (2203.73) | 3109.58 (2447.92)  | 2780.45 (2240.93)  | 0.3764  |
| aspartic acid (mg) *** | 3671.98 (3783.24) | 4923.64 (3502.12)  | 4572.02 (3868.85)  | 0.5116  |
| cystine (mg) ***       | 540.88 (436.72)   | 798.36 (576.3)     | 726.55 (478.64)    | 0.2469  |
| glutamic acid (mg) *** | 8806.78 (6865.09) | 11929.38 (7730.93) | 11319.84 (7364.84) | 0.4077  |
| glycine (mg) ***       | 1737.23 (1595.54) | 2415.98 (1718.56)  | 2004.53 (1453.76)  | 0.3897  |
| histidine (mg) ***     | 1242.83 (1364.7)  | 1600.83 (1353.42)  | 1369.05 (1176.26)  | 0.5603  |
| isoleucine (mg) ***    | 2021.95 (1578.52) | 2580.85 (1923.01)  | 2079.34 (1509.01)  | 0.4333  |
| leucine (mg) ***       | 3500.22 (2659.5)  | 4542.32 (3355.75)  | 3759 (2725.61)     | 0.4739  |
| lysine (mg) ***        | 2812.88 (3207.43) | 3671.9 (2894.2)    | 3237.88 (2796.89)  | 0.5287  |
| methionine (mg) ***    | 966.64 (891.74)   | 1242.18 (986.61)   | 1067.31 (848.35)   | 0.6096  |
| phenylalanine (mg) *** | 1964.99 (1453.52) | 2662.47 (1776.84)  | 2359.57 (1584.91)  | 0.3256  |
| proline (mg) ***       | 2982.18 (2222.47) | 3477.52 (2315.6)   | 3603.29 (1688.19)  | 0.5077  |
| serine (mg) ***        | 1905.64 (1541.95) | 2713.87 (1986.59)  | 2293.4 (1688.82)   | 0.3193  |
| threonine (mg) ***     | 1738.83 (1495.08) | 2286.03 (1590.12)  | 1942.93 (1332.24)  | 0.5105  |
| tryptophan (mg) ***    | 544.6 (404.4)     | 705.89 (516.48)    | 553.9 (426.8)      | 0.5013  |
| tyrosine (mg) ***      | 1534.83 (1183.06) | 1913.45 (1590.11)  | 1581.27 (1254.95)  | 0.4875  |
| valine (mg) ***        | 2317.77 (1737.92) | 2892.81 (2288.07)  | 2405.35 (1811.2)   | 0.4037  |
| Lipids                 |                   |                    |                    |         |
| cholesterol (mg) ***   | 189.82 (165.18)   | 239.39 (172.8)     | 237.38 (202.07)    | 0.2595  |
| SFA (g) *              | 29.07 (± 14.17)   | 30.91 (± 9.88)     | 29.08 (± 10.61)    | 0.802   |
| Trans-FA (g) ***       | 0.31 (0.55)       | 0.3 (0.46)         | 0.18 (0.58)        | 0.6113  |
| MUFA (g) ***           | 39.87 (20.05)     | 35.43 (17.43)      | 40.64 (16.88)      | 0.1958  |
| Oleic acid (g) ***     | 28.39 (13.92)     | 26.5 (10.45)       | 33.93 (20.58)      | 0.2543  |
| PUFA (g) ***           | 11.62 (7.1)       | 15.31 (7.88)       | 15.35 (6.39)       | 0.1266  |
| Linolenic acid (g) *** | 0.83 (0.59)       | 0.99 (0.64)        | 0.89 (0.71)        | 0.5862  |
| Linoleic acid (g)***   | 8.68 (5.59)       | 11.53 (7.39)       | 11.33 (4.65)       | 0.109   |
| DHA (g) ***            | 0.02 (0.04)       | 0.04 (0.08)        | 0.04 (0.06)        | 0.09831 |

|                             |                   |                   |                   |                |
|-----------------------------|-------------------|-------------------|-------------------|----------------|
| EPA (g) ***                 | 0.01 (0.01)       | 0.01 (0.02)       | 0.01 (0.02)       | 0.6998         |
| Total Dietary Fiber (g) *** | 12.9 (6.4)†       | 14.84 (9.23)‡     | 20.28 (12.83)† ‡  | <b>0.00717</b> |
| crude fiber (g) ***         | 2.07 (2.49)       | 2.49 (2.51)       | 4.11 (2.87)       | 0.05848        |
| insoluble fiber (g) ***     | 0.42 (1.2)        | 0.78 (1.32)       | 0.95 (1.82)       | 0.1065         |
| soluble fiber (g) ***       | 0.11 (0.35)       | 0.14 (0.46)       | 0.16 (0.34)       | 0.4887         |
| Minerals                    |                   |                   |                   |                |
| zinc (mg) ***               | 9.355.76          | 9.3 (4.58)        | 8.64 (6.13)       | 0.9957         |
| copper (mg) ***             | 0.85 (0.27)†      | 0.96 (0.4)        | 1.11 (0.69)†      | <b>0.01679</b> |
| chromium (mg) ***           | 0.04 (0.04)       | 0.03 (0.03)       | 0.04 (0.04)       | 0.216          |
| selenium (µg) *             | 107.02 (± 43.34)  | 115.69 (± 45.13)  | 108.23 (± 34.87)  | 0.698          |
| manganese (mg) ***          | 1.63 (0.75)       | 1.79 (1.22)       | 2.44 (2.89)       | 0.0939         |
| magnesium (mg) ***          | 213.21 (77.08)    | 247.89 (123.64)   | 274.45 (127.32)   | 0.0613         |
| molybdenum (µg) ***         | 19.87 (41.63)     | 7.35 (14.39)      | 11.88 (9.24)      | 0.4097         |
| iron (mg) ***               | 11.26 (5.32)      | 14.21 (6.06)      | 15.53 (6.06)      | 0.07197        |
| iodine (µg) ***             | 5.5 (8.79)        | 9.4 (15.95)       | 4.55 (7.88)       | 0.6181         |
| calcium (mg) ***            | 709.08 (425.6)    | 816.66 (350.02)   | 860.98 (356.36)   | 0.6009         |
| fluoride (µg) ***           | 242.55 (1464.25)  | 438.26 (2430.22)  | 403.15 (2276.24)  | 0.6267         |
| phosphorus (mg) ***         | 1104.95 (606.46)  | 1151.14 (472.97)  | 1174.08 (564.34)  | 0.6214         |
| potassium (mg) ***          | 2023.49 (1049.82) | 2414.95 (919.19)  | 2584.54 (935.76)  | 0.1798         |
| sodium (mg) ***             | 2120.27 (1020.58) | 2474.68 (1290.7)  | 2050.04 (855.48)  | 0.3389         |
| Vitamins                    |                   |                   |                   |                |
| Vitamin A (IU) ***          | 2183.04 (3393.2)  | 2783.41 (3630.28) | 3867.95 (6611.13) | 0.1154         |
| Vitamin A (RAE) (µg) ***    | 271.2 (269.5)     | 317.52 (243.74)   | 469.19 (455.59)   | 0.1029         |
| Vitamin A (RE) ***          | 422.11 (454.42)   | 464.63 (396.48)   | 700.24 (767.36)   | 0.2725         |
| Vitamin C (mg) ***          | 50.37 (46.96)     | 42.73 (60.44)     | 91.77 (106.53)    | 0.183          |
| Vitamin D (µg) ***          | 1.86 (2.36)       | 1.99 (3.66)       | 2.96 (2.23)       | 0.2145         |
| Vitamin D (IU) ***          | 61.49 (79.62)     | 70.51 (104.13)    | 120.89 (99.12)    | 0.06926        |

|                                  |                   |                   |                   |                |
|----------------------------------|-------------------|-------------------|-------------------|----------------|
| Vitamin E (mg) ***               | 0.8 (1.14)        | 0.74 (1.31)       | 1 (1.79)          | 0.4037         |
| Vitamin E (IU) ***               | 1.16 (1.72)       | 0.66 (1.58)       | 0.66 (1.99)       | 0.8972         |
| Vitamin K (µg) ***               | 73.64 (62)        | 67.38 (57.7)      | 70.88 (81.3)      | 0.6202         |
| Cobalamin (Vitamin B12) (µg) *** | 3.18 (2.22)       | 3.59 (0.98)       | 3.71 (3.1)        | 0.7718         |
| biotin (µg) ***                  | 7.83 (7.53) )†    | 10.78 (7.07)      | 12.83 (8.66) )†   | <b>0.0313</b>  |
| thiamin (mg) ***                 | 1.28 (0.72)       | 1.66 (0.86)       | 1.43 (0.73)       | 0.3257         |
| niacin (mg) ***                  | 18.23 (11.36)     | 22.98 (15.82)     | 21.94 (14.31)     | 0.2889         |
| pantothenic (mg) ***             | 2.87 (1.61)†      | 3.71 (2.14)       | 4.18 (2.52)†      | <b>0.01132</b> |
| Pyridoxine (Vitamin B6) (mg) *** | 1.46 (1.09)       | 1.54 (0.77)       | 1.69 (0.98)       | 0.4405         |
| Alpha-Carotene (µg)***           | 98.25 (233.78)    | 174.07 (509.91)   | 220.98 (641.25)   | 0.4201         |
| Beta-Carotene (µg)***            | 559.9 (1563.2)    | 1035.76 (2725.7)  | 1082.14 (3385.19) | 0.2847         |
| Beta-Cryptoxanthin (µg) ***      | 13.51 (109.66)    | 25.95 (116.38)    | 61.71 (144.56)    | 0.5684         |
| Lutein (+ Zeaxanthin) (µg) ***   | 721.19 (971.84)   | 1125.66 (1520.05) | 676.2 (1215.03)   | 0.3676         |
| lycopene (µg) ***                | 1437.21 (4034.55) | 1375.66 (3359.76) | 1857.86 (3567.55) | 0.8029         |
| Folate (DFE) (µg) ***            | 300.08 (203.41)   | 309.5 (182.54)    | 399.04 (276.24)   | 0.07691        |
| Folate (Total) (µg) ***          | 239.45 (145.94)   | 257.83 (163.18)   | 322.33 (229.65)   | 0.05953        |
| riboflavin (mg) ***              | 1.57 (0.66)       | 1.55 (0.72)       | 1.89 (0.86)       | 0.07028        |
| Alpha-Tocopherol (mg) ***        | 7.4 (4.67)        | 7.06 (4.29)       | 9.39 (4.95)       | 0.1392         |

Note: The normality assumption was checked using the Shapiro-Wilk test.; \* parametric variable, \*\*\* non parametric variable.; Parametric quantitative variables are expressed as mean ( $\pm$  standard deviation (SD)) and non-parametric quantitative variables as median (interquartile range (IQR)); P value was obtained using Kruskal-Wallis with Dunn's post-hoc test or ANOVA with Tukey's post-hoc test

for continuous non parametric and parametric variables, respectively; †Differences between low and high tertile, ‡Differences between medium and high tertile. ˆ Differences between low and medium tertile.

**Table S3.** Cont.

| Low-Fat Dairy and Poultry pattern |                   |                    |                   |         |
|-----------------------------------|-------------------|--------------------|-------------------|---------|
| Nutrients                         | Low               | Medium             | High              | p-value |
| protein (g) ***                   | 91.8 (39.23)      | 83.3 (49.48)       | 92.12 (58.58)     | 0.6765  |
| Total fat (g) ***                 | 91.46 (39.41)     | 91.46 (48.02)      | 102.66 (44.03)    | 0.703   |
| carbohydrate (g) *                | 177.2 (± 58.71)   | 188.69 (± 62.68)   | 177.16 (± 60.89)  | 0.701   |
| kilocalories (kcal) ***           | 1943.48 (639.79)  | 1887.51 (791.59)   | 1981.22 (993.7)   | 0.885   |
| Total sugar (g) ***               | 53.22 (37)        | 52.33 (41.35)      | 62.76 (35.77)     | 0.403   |
| glucose (g) ***                   | 8.75 (7.59)       | 8.67 (7.34)        | 8.35 (8.4)        | 0.6399  |
| sucrose (g) ***                   | 13.92 (16.03)     | 7.08 (11.46)       | 9.13 (9.85)       | 0.5212  |
| maltose (g) ***                   | 1.11 (1.63)       | 1.16 (1.2)         | 1 (0.67)          | 0.6521  |
| fructose (g) ***                  | 10.44 (15.46)     | 9.6 (14.66)        | 10.97 (10.77)     | 0.9052  |
| galactose (g) ***                 | 0.02 (0.1)        | 0.06 (0.14)        | 0.01 (0.04)       | 0.8229  |
| lactose (g) ***                   | 3.1 (5.76)        | 0.48 (5.39)        | 4.83 (9.01)       | 0.1049  |
| Amino acids                       |                   |                    |                   |         |
| alanine (mg) ***                  | 2240.53 (1573.17) | 2127.1 (1899.83)   | 2596.22 (2541.39) | 0.7658  |
| arginine (mg) ***                 | 2610.62 (2021.92) | 2612.07 (2029.28)  | 2936.48 (3030.26) | 0.7951  |
| aspartic acid (mg) ***            | 3763.37 (3559.25) | 4499.7 (3699.54)   | 4942.99 (4210.13) | 0.869   |
| cystine (mg) ***                  | 637.11 (503.41)   | 687.09 (400.8)     | 700.39 (620.85)   | 0.9936  |
| glutamic acid (mg) ***            | 9953.36 (8229.91) | 10034.83 (5811.46) | 11176.01 (8685)   | 0.6345  |
| glycine (mg) ***                  | 2004.53 (1008.52) | 1810.14 (1474.59)  | 2249.28 (2105.46) | 0.8251  |
| histidine (mg) ***                | 1262.16 (1125.63) | 1331.09 (1280.59)  | 1540.5 (1647.12)  | 0.7372  |
| isoleucine (mg) ***               | 2088.13 (1631.18) | 2043.15 (1429.95)  | 2438.55 (2394.63) | 0.7247  |
| leucine (mg) ***                  | 3618.52 (3108.99) | 3679.54 (2420.87)  | 4328.54 (4315.58) | 0.6442  |



|                             |                      |                     |                      |        |
|-----------------------------|----------------------|---------------------|----------------------|--------|
| lysine (mg) ***             | 3268.27 (2702.69)    | 3240.84 (2948.95)   | 3674.99 (3965.42)    | 0.6968 |
| methionine (mg) ***         | 1074.34 (716.61)     | 1029.25 (840.83)    | 1198.88 (1286.24)    | 0.556  |
| phenylalanine (mg) ***      | 2002.41 (1843.51)    | 2149.19 (1381.73)   | 2500.7 (2134.97)     | 0.7147 |
| proline (mg) ***            | 3862.15 (2437.49)    | 3066.73 (1650.51)   | 3478.74 (2432.92)    | 0.3914 |
| serine (mg) ***             | 2092.32 (1797.41)    | 2185.47 (1371.04)   | 2438.48 (1974.15)    | 0.717  |
| threonine (mg) ***          | 1837.3 (1566.33)     | 1896.52 (1337.41)   | 2204.9 (1996.55)     | 0.7531 |
| tryptophan (mg) ***         | 569.19 (435.33)      | 542.09 (370.08)     | 667.12 (577.22)      | 0.5152 |
| tyrosine (mg) ***           | 1590.53 (1135.72)    | 1615.71 (1094.42)   | 1872.07 (1703.43)    | 0.4695 |
| valine (mg) ***             | 2462.29 (1912.8)     | 2382.57 (1646.23)   | 2769.5 (2508.89)     | 0.6549 |
| Lipids                      |                      |                     |                      |        |
| cholesterol (mg) ***        | 230.14 (179.32)      | 196.1 (175.98)      | 266.1 (219.9)        | 0.432  |
| SFA (g) *                   | 29.46 ( $\pm$ 10.49) | 29.1 ( $\pm$ 13.71) | 30.27 ( $\pm$ 11.07) | 0.927  |
| Trans-FA (g) ***            | 0.39 (0.58)          | 0.25 (0.46)         | 0.21 (0.68)          | 0.3783 |
| MUFA (g) ***                | 39.73 (12.3)         | 35.42 (20.91)       | 42.35 (17.44)        | 0.2518 |
| Oleic acid (g) ***          | 30.12 (10.72)        | 26.3 (13.41)        | 32.8 (17.46)         | 0.1163 |
| PUFA (g) ***                | 14.83 (7.5)          | 12.93 (10.46)       | 15.21 (6.01)         | 0.8663 |
| Linolenic acid (g) ***      | 0.94 (0.58)          | 1.02 (0.7)          | 0.84 (0.59)          | 0.8435 |
| Linoleic acid (g)***        | 11.1 (7.05)          | 10.71 (6.59)        | 11.17 (6.52)         | 0.8679 |
| DHA (g) ***                 | 0.04 (0.08)          | 0.02 (0.04)         | 0.03 (0.05)          | 0.2132 |
| EPA (g) ***                 | 0.01 (0.04)          | 0.01 (0.02)         | 0.01 (0.01)          | 0.3633 |
| Total Dietary Fiber (g) *** | 15.92 (9.34)         | 16.61 (13.63)       | 15.34 (9.15)         | 0.6678 |
| crude fiber (g) ***         | 2.51 (3.29)          | 3.23 (2.98)         | 2.53 (2.67)          | 0.4737 |
| insoluble fiber (g) ***     | 0.42 (1.53)          | 0.55 (1.59)         | 0.97 (1.33)          | 0.2936 |
| soluble fiber (g) ***       | 0.05 (0.31)          | 0.06 (0.4)          | 0.19 (0.42)          | 0.1521 |
| Minerals                    |                      |                     |                      |        |
| zinc (mg) ***               | 9.33 (6.31)          | 9.05 (5.34)         | 9.09 (5.29)          | 0.2865 |
| copper (mg) ***             | 1.02 (0.42)          | 0.91 (0.43)         | 0.94 (0.54)          | 0.5113 |

|                                     |                         |                            |                         |                 |
|-------------------------------------|-------------------------|----------------------------|-------------------------|-----------------|
| chromium (mg) ***                   | 0.03 (0.04)             | 0.04 (0.04)                | 0.03 (0.03)             | 0.9497          |
| selenium (µg) *                     | 122.31 (± 41.89)        | 100.81 (± 38.39)           | 107.22 (± 40.62)        | 0.117           |
| manganese (mg) ***                  | 1.7 (1.48)              | 1.84 (1.17)                | 2 (1.53)                | 0.7559          |
| magnesium (mg) ***                  | 255.73 (126.46)         | 237.22 (116.64)            | 238.94 (132.33)         | 0.898           |
| molybdenum (µg) ***                 | 11.57 (9.16)            | 12.18 (47.88)              | 13.65 (27.45)           | 0.7567          |
| iron (mg) ***                       | 14.75 (6.75)            | 13.89 (7.21)               | 13.5 (6.03)             | 0.5084          |
| iodine (µg) ***                     | 7.2 (22.5) <sup>Λ</sup> | 1.73 (5.46) <sup>Λ ‡</sup> | 9.1 (8.57) <sup>‡</sup> | <b>0.006106</b> |
| calcium (mg) ***                    | 776.69 (293.09)         | 707 (366.09)               | 890.05 (370.12)         | 0.05532         |
| fluoride (µg) ***                   | 276.94 (480.12)         | 425.77 (1824.01)           | 383.03 (4459.76)        | 0.771           |
| phosphorus (mg) ***                 | 1160.26 (546.73)        | 1056.78 (449.51)           | 1288.59 (599.27)        | 0.3065          |
| potassium (mg) ***                  | 2570.4 (987.52)         | 2360.32 (1224.09)          | 2416.9 (940.23)         | 0.9598          |
| sodium (mg) ***                     | 2389.26 (1434.03)       | 2033.13 (865.16)           | 2162.97 (1415.06)       | 0.3338          |
| Vitamins                            |                         |                            |                         |                 |
| Vitamin A (IU) ***                  | 2934.74 (4613.83)       | 2681.09 (6203.26)          | 2617.63 (4022.31)       | 0.7727          |
| Vitamin A (RAE) (µg) ***            | 340.86 (414.06)         | 262.16 (302.07)            | 368.82 (307.11)         | 0.3216          |
| Vitamin A (RE) ***                  | 451.08 (561.27)         | 512.98 (586.57)            | 489.92 (527.45)         | 0.971           |
| Vitamin C (mg) ***                  | 44.88 (65.77)           | 53.99 (60.01)              | 62.61 (91.42)           | 0.5134          |
| Vitamin D (µg) ***                  | 2.23 (1.85)             | 1.66 (2.94)                | 3.15 (3.2)              | 0.1125          |
| Vitamin D (IU) ***                  | 84 (78.08)              | 58.09 (102.37)             | 111.19 (124.49)         | 0.1296          |
| Vitamin E (mg) ***                  | 0.92 (1.45)             | 0.66 (1.63)                | 0.82 (1.14)             | 0.9228          |
| Vitamin E (IU) ***                  | 0.66 (1.79)             | 0.71 (1.96)                | 0.86 (1.4)              | 0.8476          |
| Vitamin K (µg) ***                  | 70.89 (51.77)           | 77.19 (113.73)             | 60.47 (50.95)           | 0.3737          |
| Cobalamin (Vitamin B12)<br>(µg) *** | 3.66 (1.91)             | 2.25 (3.08)                | 3.65 (1.56)             | 0.1563          |
| biotin (µg) ***                     | 9.61 (8.92)             | 9.38 (9.9)                 | 10.98 (7.95)            | 0.8822          |
| thiamin (mg) ***                    | 1.78 (0.78)             | 1.32 (0.78)                | 1.42 (0.81)             | 0.2771          |
| niacin (mg) ***                     | 24.55 (18.78)           | 17.29 (12.61)              | 21.43 (12.3)            | 0.159           |

|                                  |                  |                   |                   |         |
|----------------------------------|------------------|-------------------|-------------------|---------|
| pantothenic (mg) ***             | 3.63 (2.46)      | 3.51 (2.25)       | 3.73 (1.68)       | 0.7967  |
| Pyridoxine (Vitamin B6) (mg) *** | 1.47 (0.98)      | 1.57 (0.79)       | 1.6 (0.91)        | 0.9124  |
| Alpha-Carotene (µg)***           | 220.98 (495.65)  | 151.37 (708.59)   | 84.54 (337.84)    | 0.5198  |
| Beta-Carotene (µg)***            | 1155.99 (2674.2) | 729.67 (2997.17)  | 686.15 (2282.08)  | 0.5218  |
| Beta-Cryptoxanthin (µg) ***      | 27.87 (141.61)   | 12.52 (112.05)    | 60.43 (152.53)    | 0.3368  |
| Lutein (+ Zeaxanthin) (µg) ***   | 1069.55 (905.36) | 818.49 (1904.71)  | 571.21 (1071.86)  | 0.1882  |
| lycopene (µg) ***                | 1286.5 (3891.61) | 1377.54 (3344.56) | 1857.98 (3939.82) | 0.8602  |
| Folate (DFE) (µg) ***            | 335.12 (251.05)  | 337.05 (127.39)   | 325.07 (221.62)   | 0.6739  |
| Folate (Total) (µg) ***          | 287.62 (190.32)  | 274.96 (156.2)    | 253.24 (171.17)   | 0.5315  |
| riboflavin (mg) ***              | 1.69 (0.98)      | 1.5 (0.73)        | 1.64 (0.88)       | 0.09782 |
| Alpha-Tocopherol (mg) ***        | 8.77 (3.08)      | 7.98 (4.59)       | 8.39 (5.15)       | 0.8628  |

Note: The normality assumption was checked using the Shapiro-Wilk test.; \* parametric variable, \*\*\* non parametric variable.; Parametric quantitative variables are expressed as mean ( $\pm$  standard deviation (SD)) and non-parametric quantitative variables as median (interquartile range (IQR)); P value was obtained using Kruskal-Wallis with Dunn's post-hoc test or ANOVA with Tukey's post-hoc test for continuous non parametric and parametric variables, respectively; †Differences between low and high tertile, ‡Differences between medium and high tertile. ⋈ Differences between low and medium tertile.

**Table S4.** The associations of the “High-sugar”, “Prudent”, “High-Fat and Salt” and “Plant-Based” patterns with the MRI parameters in the MAST4HEALTH obese and NAFLD patients.

| High-Sugar pattern |      |                         |         |                        |         |                              |
|--------------------|------|-------------------------|---------|------------------------|---------|------------------------------|
| Low                |      | Medium                  |         | High                   |         | High-Sugar pattern           |
| Variables          |      | Beta (SE)               | P value | Beta (SE)              | P value | Beta (SE) P value            |
| Log- cT1 (ms)      |      |                         |         |                        |         |                              |
| Model 1            | Ref. | -0.009363 (0.022515)    | 0.678   | 0.016227 (0.022515)    | 0.473   | 0.007697 (0.009128) 0.401    |
| Model 2            | Ref. | -0.0095422 (0.0226940)  | 0.675   | 0.0160929 (0.0227151)  | 0.481   | 0.0080551 (0.0092216) 0.385  |
| Model 3            | Ref. | -0.0086118 (0.0221082)  | 0.698   | 0.0129563 (0.0221637)  | 0.56    | 0.0064641 (0.0090000) 0.4745 |
| Model 4            | Ref. | -5.309e-03 (2.361e-02)  | 0.8227  | 2.673e-02 (2.476e-02)  | 0.2839  | 1.061e-02 (1.003e-02) 0.2936 |
| Model 5            | Ref. | -5.100e-03 (2.375e-02)  | 0.8306  | 2.893e-02 (2.545e-02)  | 0.2594  | 1.126e-02 (1.028e-02) 0.2769 |
| Log-PDFF (%)       |      |                         |         |                        |         |                              |
| Model 1            | Ref. | 0.05935 (0.17995)       | 0.742   | 0.21370 (0.18140)      | 0.242   | 0.11163 (0.07441) 0.137      |
| Model 2            | Ref. | 0.058520 (0.176111)     | 0.7404  | 0.189930 (0.178059)    | 0.289   | 0.105188 (0.073345) 0.155    |
| Model 3            | Ref. | 0.058877 (0.176845)     | 0.74    | 0.178793 (0.180153)    | 0.3237  | 0.100729 (0.074249) 0.17829  |
| Model 4            | Ref. | 5.409e-02 (1.943e-01 )  | 0.7815  | 2.406e-01 ( 2.066e-01) | 0.248   | 1.108e-01 (8.486e-02) 0.1958 |
| Model 5            | Ref. | 5.144e-02 (1.955e-01)   | 0.7932  | 2.192e-01 (2.132e-01)  | 0.3074  | 1.022e-01 (8.748e-02) 0.2463 |
| LIF                |      |                         |         |                        |         |                              |
| Model 1            | Ref. | -0.06037 (0.16042)      | 0.708   | 0.06206 (0.16042)      | 0.7     | 0.05167 (0.06479) 0.427      |
| Model 2            | Ref. | -0.061392 (0.162048)    | 0.706   | 0.060667 (0.162199)    | 0.709   | 0.052820 (0.065612) 0.423    |
| Model 3            | Ref. | -0.054358 (0.157235)    | 0.7304  | 0.036954 (0.157629)    | 0.8152  | 0.040937 (0.063815) 0.5229   |
| Model 4            | Ref. | -2.399e-02 (1.680e-01)  | 0.8868  | 1.109e-01 (1.762e-01)  | 0.5309  | 7.392e-02 (7.081e-02) 0.3    |
| Model 5            | Ref. | -2.369e-02 (1.692e-01)  | 0.8890  | 1.141e-01 (1.813e-01)  | 0.5310  | 7.554e-02 (7.263e-02) 0.3018 |
| Prudent Pattern    |      |                         |         |                        |         |                              |
| Low                |      | Medium                  |         | High                   |         | Prudent Pattern              |
| Variables          |      | Beta (SE)               | P value | Beta (SE)              | P value | Beta (SE) P value            |
| Log- cT1 (ms)      |      |                         |         |                        |         |                              |
| Model 1            | Ref. | -0.02325 (0.02254)      | 0.305   | -0.01587 (0.02218)     | 0.476   | -0.012229 (0.008979) 0.177   |
| Model 2            | Ref. | '-0.0206597 (0.0232480) | 0.377   | -0.0140934 (0.0226033) | 0.535   | -0.0115590 (0.0092714) 0.216 |

|              |      |                         |         |                        |         |                         |         |
|--------------|------|-------------------------|---------|------------------------|---------|-------------------------|---------|
| Model 3      | Ref. | -0.0298663 (0.0227096)  | 0.19188 | -0.0244865 (0.0221650) | 0.27229 | -0.0121809 (0.0090016)  | 0.1794  |
| Model 4      | Ref. | -2.855e-02 (2.609e-02 ) | 0.2775  | -3.049e-02 (2.590e-02) | 0.243   | -1.744e-02 (1.021e-02)  | 0.0919  |
| Model 5      | Ref. | -2.835e-02 (2.621e-02)  | 0.2831  | -2.812e-02 (2.631e-02) | 0.2888  | -1.659e-02 (1.059e-02)  | 0.1215  |
| Log-PDFF (%) |      |                         |         |                        |         |                         |         |
| Model 1      | Ref. | -0.2533 (0.1824)        | 0.168   | -0.1707 (0.1811)       | 0.348   | -0.06483 (0.07375)      | 0.382   |
| Model 2      | Ref. | -0.205675 (0.180812)    | 0.2583  | -0.162368 (0.178287)   | 0.3649  | -0.079181 (0.073286)    | 0.2828  |
| Model 3      | Ref. | -0.227887 (0.182969)    | 0.2162  | -0.183651 (0.180312)   | 0.3112  | -0.079797 (0.073518)    | 0.28064 |
| Model 4      | Ref. | -3.094e-01 (2.105e-01)  | 0.1458  | -2.965e-01 (2.119e-01) | 0.1658  | -1.197e-01 (8.472e-02)  | 0.1618  |
| Model 5      | Ref. | -3.094e-01 (2.118e-01)  | 0.1485  | -3.039e-01 (2.159e-01) | 0.1636  | -1.293e-01 (8.787e-02)  | 0.1456  |
| LIF          |      |                         |         |                        |         |                         |         |
| Model 1      | Ref. | -0.13505 (0.16032)      | 0.402   | -0.05614 (0.15772)     | 0.723   | -0.08031 (0.06380)      | 0.211   |
| Model 2      | Ref. | -0.124743 (0.165544)    | 0.453   | -0.049999 (0.160952)   | 0.757   | -0.0798539 (0.0659564)  | 0.229   |
| Model 3      | Ref. | -0.191791 (0.161397)    | 0.23791 | -0.125688 (0.157527)   | 0.42709 | -0.084480 (0.063817)    | 0.18896 |
| Model 4      | Ref. | -1.224e-01 ( 1.835e-01) | 0.507   | -8.499e-02 (1.822e-01) | 0.642   | -7.607e-02 ( 7.211e-02) | 0.2949  |
| Model 5      | Ref. | -1.216e-01 (1.847e-01)  | 0.5123  | -7.563e-02 (1.854e-01) | 0.6846  | -7.397e-02 (7.480e-02)  | 0.3260  |

| High-Fat and Salt pattern |      |                        |         |                       |          | High-Fat and Salt Pattern |         |
|---------------------------|------|------------------------|---------|-----------------------|----------|---------------------------|---------|
| Low                       |      | Medium                 |         | High                  |          |                           |         |
| Variables                 |      | Beta (SE)              | P value | Beta (SE)             | P value  | Beta (SE)                 | P value |
| Log- cT1 (ms)             |      |                        |         |                       |          |                           |         |
| Model 1                   | Ref. | 0.01811 (0.02258)      | 0.425   | 0.01626 (0.02222)     | 0.466    | 0.008804 (0.009045)       | 0.333   |
| Model 2                   | Ref. | 0.0176325 (0.0228271)  | 0.442   | 0.0140766 (0.0226289) | 0.535    | 0.007833 (0.009257)       | 0.4     |
| Model 3                   | Ref. | 0.0160940 (0.0222091)  | 0.4706  | 0.0131197 (0.0220110) | 0.5527   | 0.0063725 (0.0090296)     | 0.4822  |
| Model 4                   | Ref. | 1.465e-02 (2.411e-02)  | 0.5452  | 1.090e-02 (2.404e-02) | 6.52E-01 | 7.338e-03 (9.989e-03)     | 0.4649  |
| Model 5                   | Ref. | 1.587e-02 (2.440e-02)  | 0.5175  | 1.043e-02 (2.420e-02) | 0.6678   | 7.065e-03 (1.008e-02)     | 0.4858  |
| Log-PDFF (%)              |      |                        |         |                       |          |                           |         |
| Model 1                   | Ref. | -0.06753 (0.18165)     | 0.711   | 0.14371 (0.17865)     | 0.423    | 0.05280 (0.07352)         | 0.474   |
| Model 2                   | Ref. | -0.095125 (0.177561)   | 0.5935  | 0.133436 (0.175963)   | 0.4502   | 0.042520 (0.072888)       | 0.561   |
| Model 3                   | Ref. | -0.100473 (0.178369)   | 0.5747  | 0.126750 (0.176882)   | 0.4755   | 0.039272 (0.073338)       | 0.5936  |
| Model 4                   | Ref. | -1.046e-01 (1.960e-01) | 0.595   | 1.214e-01 (1.968e-01) | 0.539    | 0.0373 (8.308e-02)        | 0.6548  |

|         |      |                        |        |                       |        |                       |        |
|---------|------|------------------------|--------|-----------------------|--------|-----------------------|--------|
| Model 5 | Ref  | -1.163e-01 (1.979e-01) | 0.5585 | 1.295e-01 (1.982e-01) | 0.5156 | 4.104e-02 (8.396e-02) | 0.6264 |
| LIF     |      |                        |        |                       |        |                       |        |
| Model 1 | Ref. | 0.1964 (0.1594)        | 0.221  | 0.1721 (0.1568)       | 0.275  | 0.06297 (0.06417)     | 0.329  |
| Model 2 | Ref. | 0.193896 (0.161391)    | 0.233  | 0.165007 (0.159990)   | 0.305  | 0.059625 (0.065787)   | 0.367  |
| Model 3 | Ref. | 0.182495 (0.156484)    | 0.247  | 0.157915 (0.155088)   | 0.311  | 0.048755 (0.063958)   | 0.4479 |
| Model 4 | Ref. | 1.811e-01 (1.691e-01)  | 0.288  | 1.024e-01 (1.687e-01) | 0.5456 | 4.364e-02 (7.053e-02) | 0.538  |
| Model 5 | Ref  | 1.864e-01 (1.713e-01)  | 0.2804 | 1.004e-01 (1.700e-01) | 0.5566 | 4.296e-02 (7.125e-02) | 0.5484 |

| Plant-Based pattern |      |                        |         |                        |         | Plant-Based pattern   |         |
|---------------------|------|------------------------|---------|------------------------|---------|-----------------------|---------|
| Low                 |      | Medium                 |         | High                   |         |                       |         |
| Variables           |      | Beta (SE)              | P value | Beta (SE)              | P value | Beta (SE)             | P value |
| Log- cT1 (ms)       |      |                        |         |                        |         |                       |         |
| Model 1             | Ref. | -0.02379 (0.02219)     | 0.286   | 0.02309 (0.02163)      | 0.289   | 0.012699 (0.009007)   | 0.162   |
| Model 2             | Ref. | -0.0236373 (0.0231447) | 0.31    | 0.025833 (0.0220403)   | 0.244   | 0.014794 (0.009246)   | 0.113   |
| Model 3             | Ref. | -0.0301260 (0.0226992) | 0.1879  | 0.015908 (0.0218537)   | 0.4686  | 0.0096897 (0.0093605) | 0.3034  |
| Model 4             | Ref. | -3.167e-02 (2.571e-02) | 0.222   | 1.674e-02 (2.429e-02)  | 0.4931  | 7.841e-03 (1.050e-02) | 0.4577  |
| Model 5             | Ref  | -3.141e-02 (2.595e-02) | 0.2302  | 1.642e-02 (2.457e-02)  | 0.5061  | 7.240e-03 (1.072e-02) | 0.5016  |
| Log-PDFF (%)        |      |                        |         |                        |         |                       |         |
| Model 1             | Ref. | -0.28777 (0.18137)     | 0.116   | -0.02379 (0.17707)     | 0.893   | 0.01567 (0.07446)     | 0.834   |
| Model 2             | Ref. | -0.199071 (0.183026)   | 0.2796  | 0.003632 (0.175640)    | 0.9835  | 0.029830 (0.073881)   | 0.6873  |
| Model 3             | Ref. | -0.212570 (0.184686)   | 0.2528  | -0.020352 (0.179768)   | 0.9101  | 0.018798 (0.076709)   | 0.807   |
| Model 4:            | Ref. | -1.394e-01 (2.120e-01) | 0.5131  | -1.250e-02 (2.057e-01) | 0.9517  | 1.440e-02 (8.781e-02) | 0.8702  |
| Model 5             | Ref  | -1.401e-01 (2.132e-01) | 0.5132  | -1.699e-04 (2.085e-01) | 0.9994  | 2.203e-02 (8.996e-02) | 0.8072  |
| LIF                 |      |                        |         |                        |         |                       |         |
| Model 1             | Ref. | -0.1250 (0.1580)       | 0.431   | 0.1781 (0.1540)        | 0.251   | 0.09310 (0.06387)     | 0.148   |
| Model 2             | Ref. | -0.122907 (0.165354)   | 0.459   | 0.190982 (0.157464)    | 0.228   | 0.103658 (0.065770)   | 0.119   |
| Model 3             | Ref. | -0.171029 (0.161753)   | 0.2932  | 0.117376 (0.155728)    | 0.453   | 0.065216 (0.066372)   | 0.3285  |
| Model 4             | Ref. | -2.985e-01 (1.804e-01) | 0.1024  | 3.907e-02 (1.705e-01)  | 0.8194  | 2.107e-02 (7.416e-02) | 0.7771  |
| Model 5             | Ref  | -3.004e-01 (1.821e-01) | 0.1035  | 4.149e-02 (1.724e-01)  | 0.8106  | 1.958e-02 (7.574e-02) | 0.7967  |

The cT1 (ms) and PDFF (%) were log-transformed due to the skewness of the distribution. Four adjustment sets were considered: Model 1: crude model; Model 2: adjusted for age + sex; Model 3: adjusted for Model 2 + BMI; Model 4: adjusted for Model 3 + PAL + smoking + center of the study + the other five dietary patterns; Model 5: adjusted for Model 4 + alcohol intake [yes/no]. A P value < 0.05 was considered significant in all tests. Ref: Reference (the low tertile of each dietary pattern was used as a reference group). Beta: beta coefficient. SE: standard error.
